# Supplementary material
Source: PubMed Central journal article supplement (PMC11483880)
Supplement: SC-015-D4SC03599B-s001.pdf [file SC-015-D4SC03599B-s001.pdf]

Supporting Information

**Highly Enhanced Chiroptical Effect from Self-Inclusion Helical Nanocrystals of Tetraphenylethylene Bimacrocycles**

Ming Hu,<sup>†</sup> Feng-Ying Ye,<sup>†</sup> Wei Yu,<sup>†</sup> Kang Sheng,<sup>†</sup> Zhi-Rong Xu,<sup>†</sup> Jin-Jin Fu,<sup>†</sup> Xin Wen,<sup>§</sup> Hai-Tao Feng,<sup>\*,‡</sup> Minghua Liu,<sup>§</sup> and Yan-Song Zheng<sup>\*,†</sup>

<sup>†</sup> Key Laboratory of Material Chemistry for Energy Conversion and Storage, Ministry of Education, School of Chemistry and Chemical Engineering, Huazhong University of Science and Technology, Wuhan 430074, China. Email: [zyansong@hotmail.com](mailto:zyansong@hotmail.com).

<sup>‡</sup> AIE Research Center, Shaanxi Key Laboratory of Phytochemistry, College of Chemistry and Chemical Engineering, Baoji University of Arts and Sciences, Baoji 721013, China. Email: [haitaofeng907@163.com](mailto:haitaofeng907@163.com).

<sup>§</sup> Beijing National Laboratory for Molecular Science (BNLMS), CAS Key Laboratory of Colloid Interface and Chemical Thermodynamics, Institute of Chemistry, Chinese Academy of Sciences, Beijing 100190, China

**Materials and Methods**

**Materials:** All reagents and solvents were chemical pure (CP) grade or analytical reagent (AR) grade and were bought from China National Pharmaceutical Group Corporation, Aladdin (Shanghai) Bio-Chem Technology Co Ltd, and Meryer (Shanghai) Chemical Technology Co Ltd et al. These reagents and solvents were used as received unless otherwise indicated.

**Measurements:** <sup>1</sup>H NMR and <sup>13</sup>C NMR spectra were measured on a Bruker AV 400 spectrometer at 298 K in deuterated reagents. Infrared spectra were recorded on Bruker EQUINAX55 spectrometer. Mass spectrum was measured on an Ion Spec 4.7 Tesla FTMS instrument. Absorption spectra were recorded on a Hewlett Packard 8453 UV-Vis spectrophotometer. Fluorescent spectra were collected on a Shimadzu RF-5301 fluorophotometer at 298 K. The single crystal data was collected on Rigaku Saturn diffractometer with CCD area detector. The fluorescence quantum yield was measured by Edinburgh F55500w. Circular dichroism (CD) spectra were recorded on JASCO J-810, JASCO J-1500, J-1700 or Chirascan VX spectrometers. Circular polarized luminescence (CPL) spectra were measured on a JASCO CPL200 spectrometer. scanning electron microscope (SEM) images were recorded on a GeminiSEM300 electron microscopy. Transmission Electron Microscope (TEM) images were recorded on a FEI Technai G2 20 electron microscopy at 200 kV.

**Single crystal growing:** The single crystals of hydrochlorides of *R*-7 were obtained through injecting HCl gas to the methanol suspension of *R*-7 until reaching clear solution, and then 1,4-dioxane is added as the poor-solvent. The crystal is cultured by slow evaporation of the mixed solvent.

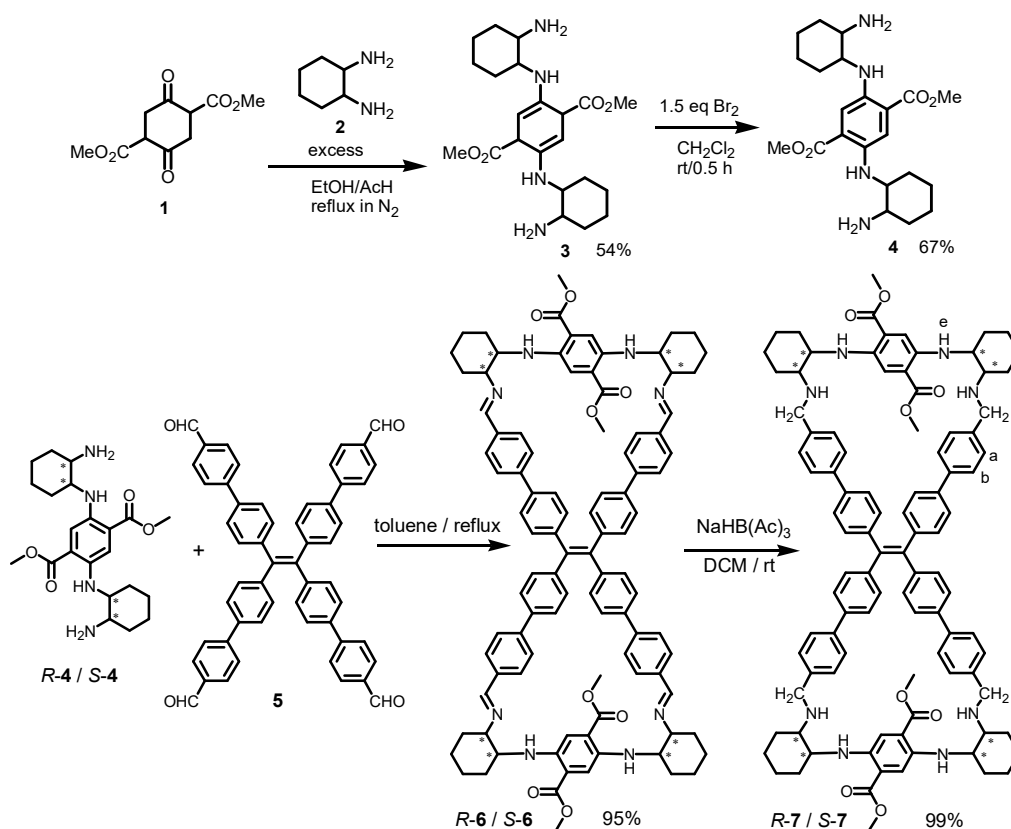

### Synthesis of *R*-3 or *S*-3

To a reaction glass bottle was added *R*-2 or *S*-2 (25 g, 219 mmol) and 200 mL ethanol and the solution was bubbled by nitrogen for 20 minutes to remove oxygen. Then **1** (5 g, 21.9 mmol) and 10 mL acetic acid were added in order. The reaction bottle was sealed and stirred at 80 °C for 24 h. After the reaction was finished, the solution was cooled to room temperature and frozen for 4 h, and the resultant sediment was collected by filtering and rinsed with methanol to get white solid *R*-3 or *S*-3 (4.87 g, 8.57 mmol, 52.9%) without additional purification steps.

### Synthesis of *R*-4

To *R*-3 (4.50 g, 11.9 mmol) in 200 ml dried dichloromethane was slowly dropped liquid bromine (2.85 g, 17.8 mmol) in 10 ml at room temperature. After the solution was stirring for 30 minutes, saturated Na<sub>2</sub>CO<sub>3</sub> solution and excessive dichloromethane were added. Under vigorously stirring, the reaction mixture was reverted to a bright red color. The solution was dried by Na<sub>2</sub>SO<sub>4</sub> and then purified by column chromatography on silica gel with dichloromethane/methanol/triethylamine (500:40:0.5) to give compound *R*-4 as a red solid (3.00 g, 7.2 mmol 66.7%). [α]<sub>D</sub><sup>25</sup> = -445° (CHCl<sub>3</sub>, c = 2 mg/mL). Mp = 176-178 °C. <sup>1</sup>H NMR (400 MHz, CDCl<sub>3</sub>) δ 7.42 (s, 2H), 6.71 (d, J = 8 Hz, 2H), 3.89 (s, 6H), 3.07 (d, J = 8 Hz, 2H), 2.64 (dd, J = 8, 4.0 Hz, 2H), 2.11 – 1.94 (m, 4H), 1.78 – 1.67 (m, 4H), 1.62 (s, 4H), 1.33 (d, J = 8 Hz, 6H), 1.22 – 1.04 (m, 2H). <sup>13</sup>C NMR (101 MHz, CDCl<sub>3</sub>) δ 168.55, 141.24, 117.33, 115.30, 59.91, 55.89, 51.94, 34.75, 32.31, 25.28, 24.86. IR (KBr) ν 3450, 3358, 3295, 3022, 2991, 2922, 2854, 1687, 1535, 1436, 1419, 1223, 1191, 1107, 875, 788. ESI<sup>+</sup> HRMS m/z calcd for C<sub>22</sub>H<sub>35</sub>N<sub>4</sub>O<sub>4</sub><sup>+</sup> 419.2658, [M + H]<sup>+</sup>, found 419.2675 [M + H]<sup>+</sup>

### Synthesis of *S*-4

The synthetic procedure was the same as *R-4*.  $[\alpha]^{25}_D = +458^\circ$  (CHCl<sub>3</sub>, c = 2 mg/mL). Mp = 176-178 °C. <sup>1</sup>H NMR (400 MHz, CDCl<sub>3</sub>)  $\delta$  7.41 (s, 2H), 6.71 (d, *J* = 8 Hz, 2H), 3.88 (s, 6H), 3.07 (s, 2H), 2.65 (d, *J* = 4 Hz, 2H), 2.13 – 1.93 (m, 4H), 1.72 (s, 4H), 1.61 (s, 4H), 1.31 (d, *J* = 8 Hz, 6H), 1.22 – 1.04 (m, 2H). <sup>13</sup>C NMR (101 MHz, CDCl<sub>3</sub>)  $\delta$  168.55, 141.24, 117.33, 115.30, 59.91, 55.89, 51.94, 34.75, 32.31, 25.28, 24.86. IR (KBr)  $\nu$  3357, 3292, 3022, 2991, 2922, 2854, 1687, 1535, 1436, 1419, 1223, 1191, 1107, 875, 788. ESI<sup>+</sup> HRMS *m/z* calcd for C<sub>22</sub>H<sub>35</sub>N<sub>4</sub>O<sub>4</sub><sup>+</sup> 419.2658, [M + H]<sup>+</sup>, found 419.2690 [M + H]<sup>+</sup>

#### Synthesis of *R-6*

*R-4* (223.5 mg, 0.535 mmol) and **5** (200 mg, 0.267 mmol) were added into 40 mL dried toluene. The reaction bottle was sealed and then was stirred at 110 °C for 12 hours under nitrogen protection. The product precipitated from the solution as the reaction proceeded. Excessive acetonitrile was added to make product completely precipitate and the solid was filtered and rinsed repeatedly with acetonitrile to furnish compound *R-6* (383.5 mg, 0.254 mmol 95%).  $[\alpha]^{25}_D = -664^\circ$  (CHCl<sub>3</sub>, c = 2 mg/mL). Mp > 300 °C. <sup>1</sup>H NMR (400 MHz, CDCl<sub>3</sub>)  $\delta$  8.32 (s, 4H), 7.70 (d, *J* = 8 Hz, 8H), 7.50 (d, *J* = 8 Hz, 8H), 7.36 (s, 4H), 7.32 (d, *J* = 8 Hz, 8H), 7.08 (d, *J* = 8 Hz, 8H), 6.58 (d, *J* = 8 Hz, 3H), 3.82 (s, 12H), 3.41 (s, 5H), 3.08 (q, *J* = 8 Hz, 4H), 2.19 (d, *J* = 12 Hz, 4H), 1.92 – 1.73 (m, 16H), 1.60 (s, 6H), 1.42 (d, *J* = 8 Hz, 8H), 1.24 (s, 8H). <sup>13</sup>C NMR (101 MHz, CDCl<sub>3</sub>)  $\delta$  168.61, 159.82, 141.30, 135.42, 131.62, 128.62, 126.55, 126.04, 116.82, 115.04, 58.01, 51.65, 25.29, 24.55. IR (KBr)  $\nu$  3353, 3080, 3027, 2988, 2926, 2853, 1907, 1690, 1643, 1572, 1535, 1438, 1415, 1217, 1108, 973, 801, 727, 607, 500, 438. ESI<sup>+</sup> HRMS *m/z* calcd for C<sub>98</sub>H<sub>97</sub>N<sub>8</sub>O<sub>8</sub><sup>+</sup> 1513.7429, [M + H]<sup>+</sup>, found 1513.7476 [M + H]<sup>+</sup>.

#### Synthesis of *S-6*

The synthetic procedure was the same as *R-6*.  $[\alpha]^{25}_D = +670^\circ$  (CHCl<sub>3</sub>, c = 2 mg/mL). Mp > 300 °C. <sup>1</sup>H NMR (400 MHz, CDCl<sub>3</sub>)  $\delta$  8.32 (s, 4H), 7.70 (d, *J* = 8.0 Hz, 8H), 7.50 (d, *J* = 8.0 Hz, 8H), 7.36 (s, 4H), 7.32 (d, *J* = 8.0 Hz, 8H), 7.08 (d, *J* = 8 Hz, 8H), 6.58 (d, *J* = 8 Hz, 3H), 3.82 (s, 12H), 3.41 (s, 4H), 3.08 (d, *J* = 8.0 Hz, 4H), 2.19 (d, *J* = 12 Hz, 5H), 1.87 – 1.71 (m, 16H), 1.62 (s, 4H), 1.42 (d, *J* = 8.0 Hz, 8H), 1.25 (s, 8H). <sup>13</sup>C NMR (101 MHz, CDCl<sub>3</sub>)  $\delta$  168.61, 159.82, 141.30, 135.42, 131.62, 128.62, 126.55, 126.04, 116.82, 115.04, 58.01, 51.65, 25.29, 24.55. IR (KBr)  $\nu$  3353, 3080, 3027, 2988, 2926, 2853, 1907, 1690, 1643, 1572, 1535, 1438, 1415, 1217, 1108, 973, 801, 727, 607, 500, 438. ESI<sup>+</sup> HRMS *m/z* calcd for C<sub>98</sub>H<sub>97</sub>N<sub>8</sub>O<sub>8</sub><sup>+</sup> 1513.7429, [M + H]<sup>+</sup>, found 1513.7485 [M + H]<sup>+</sup>.

#### Synthesis of *R-7*

*R-6* (300 mg, 198 mmol) was dissolved into dried dichloromethane and excess sodium triacetoxyborohydride was then added. The reaction mixture was stirred at room temperature and was monitored by TLC until clear product spot appeared. At the end of the reaction, Na<sub>2</sub>CO<sub>3</sub> solution was used to neutralize the reaction to be basic, and the separated organic phase was dried by Na<sub>2</sub>SO<sub>4</sub> and concentrated. Then excessive acetonitrile was added to precipitate the product. After filtration, the filter cake was rinsed with methanol and acetonitrile to give pure *R-7* (298 mg, 196 mmol, 99%) as orange-red solid.  $[\alpha]^{25}_D = -602^\circ$  (CHCl<sub>3</sub>, c = 2 mg/mL). Mp > 300 °C. <sup>1</sup>H NMR (400 MHz, CDCl<sub>3</sub>)  $\delta$  7.44 (d, *J* = 8 Hz, 8H), 7.35 (s, 4H), 7.31 (s, 4H), 7.29 (s, 8H), 7.27 (s, 4H), 7.09 (d, *J* = 8.0 Hz, 8H), 6.64 (d, *J* = 8 Hz, 4H), 3.97 (d, *J* = 8 Hz, 4H), 3.84 (s, 13H), 3.41 (d, *J* = 8 Hz, 4H), 3.30 (d, *J* = 8 Hz, 4H), 2.51 (s, 4H), 2.29 (d, *J* = 8 Hz, 4H), 2.01 (d, *J* = 12 Hz, 6H), 1.93 (s, 4H), 1.83 – 1.71 (m, 8H), 1.33 (s, 8H), 1.23 (d, *J* = 16 Hz, 8H). <sup>13</sup>C NMR (101 MHz, CDCl<sub>3</sub>)  $\delta$  168.54, 142.36, 141.12, 139.37, 139.30, 138.80, 131.69, 129.27, 126.85, 126.11, 117.27, 114.80, 63.54, 56.79, 52.53, 51.76, 33.06, 31.11, 25.35, 24.45.

IR (KBr)  $\nu$  3340, 5025, 2991, 2924, 2853, 2805, 1905, 1691, 1534, 1437, 1319, 1216, 1103, 1004, 812, 790, 619, 577. ESI<sup>+</sup> HRMS  $m/z$  calcd for C<sub>98</sub>H<sub>105</sub>N<sub>8</sub>O<sub>8</sub><sup>+</sup> 1522.8089, [M + H]<sup>+</sup>, found 1522.7991 [M + H]<sup>+</sup>.

### Synthesis of *S-7*

The synthetic procedure was the same as *R-7*.  $[\alpha]_D^{25} = +606^\circ$  (CHCl<sub>3</sub>,  $c = 2$  mg/mL). Mp > 300 °C. <sup>1</sup>H NMR (400 MHz, CDCl<sub>3</sub>)  $\delta$  7.43 (d,  $J = 8$  Hz, 8H), 7.35 (s, 4H), 7.31 (s, 4H), 7.29 (s, 8H), 7.27 (s, 4H), 7.08 (d,  $J = 8.0$  Hz, 8H), 6.64 (d,  $J = 8$  Hz, 4H), 3.98 (d,  $J = 8$  Hz, 4H), 3.84 (s, 12H), 3.41 (d,  $J = 8$  Hz, 4H), 3.36 – 3.23 (m, 4H), 2.51 (s, 4H), 2.29 (s, 4H), 2.17 (s, 6H), 2.00 (d,  $J = 12$  Hz, 4H), 1.77 (m, 8H), 1.33 (s, 8H), 1.22 (d,  $J = 16$  Hz, 8H). <sup>13</sup>C NMR (101 MHz, CDCl<sub>3</sub>)  $\delta$  168.54, 142.36, 141.12, 139.37, 139.30, 138.80, 131.69, 129.27, 126.85, 126.11, 117.27, 114.80, 63.54, 56.79, 52.53, 51.76, 33.06, 31.11, 25.35, 24.45. IR (KBr)  $\nu$  3340, 5025, 2991, 2924, 2853, 2805, 1905, 1691, 1534, 1437, 1319, 1216, 1103, 1004, 812, 790, 619, 577. ESI<sup>+</sup> HRMS  $m/z$  calcd for C<sub>98</sub>H<sub>105</sub>N<sub>8</sub>O<sub>8</sub><sup>+</sup> 1522.8089, [M + H]<sup>+</sup>, found 1522.8055 [M + H]<sup>+</sup>.

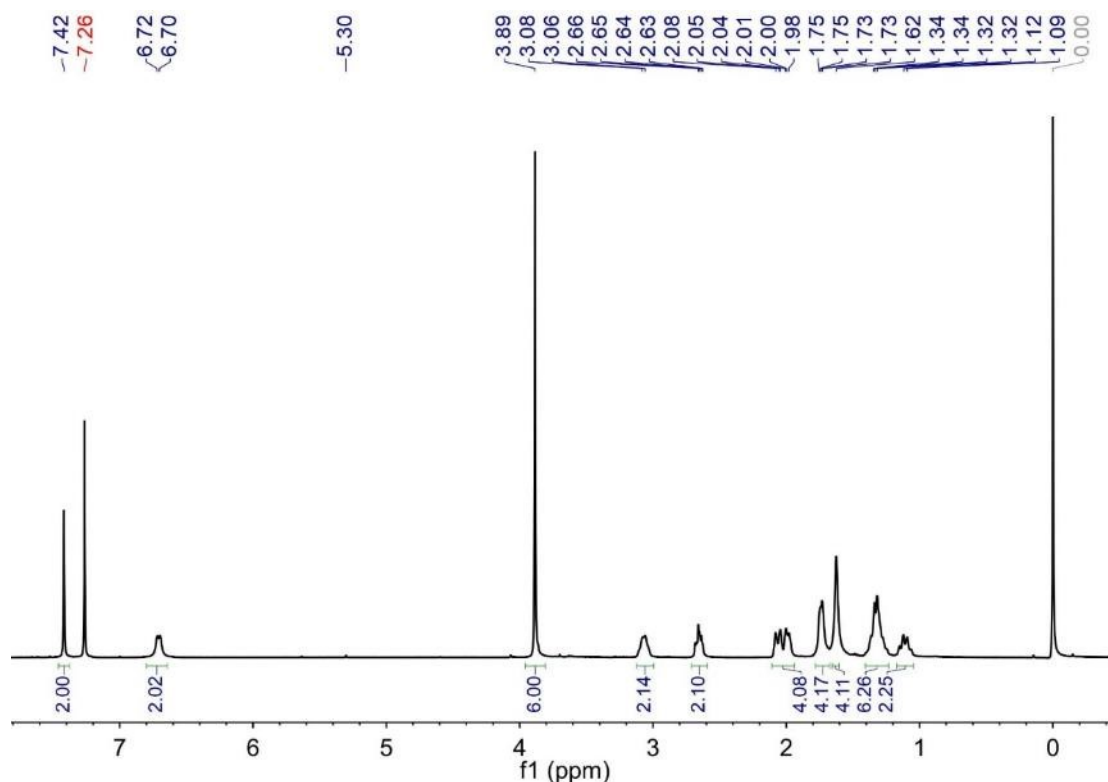

Fig. S1. <sup>1</sup>H NMR spectrum of compound *R-4* in CDCl<sub>3</sub>.

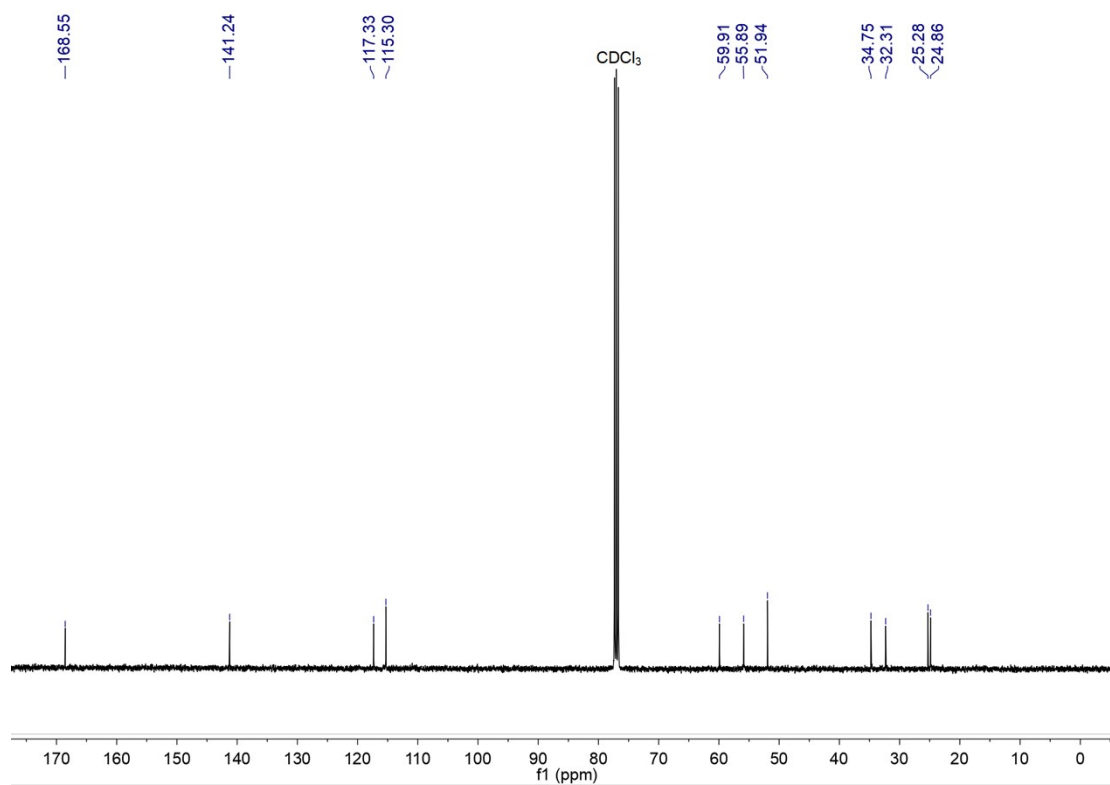

Fig. S2.  $^{13}\text{C}$  NMR spectrum of compound *R-4* in  $\text{CDCl}_3$ .

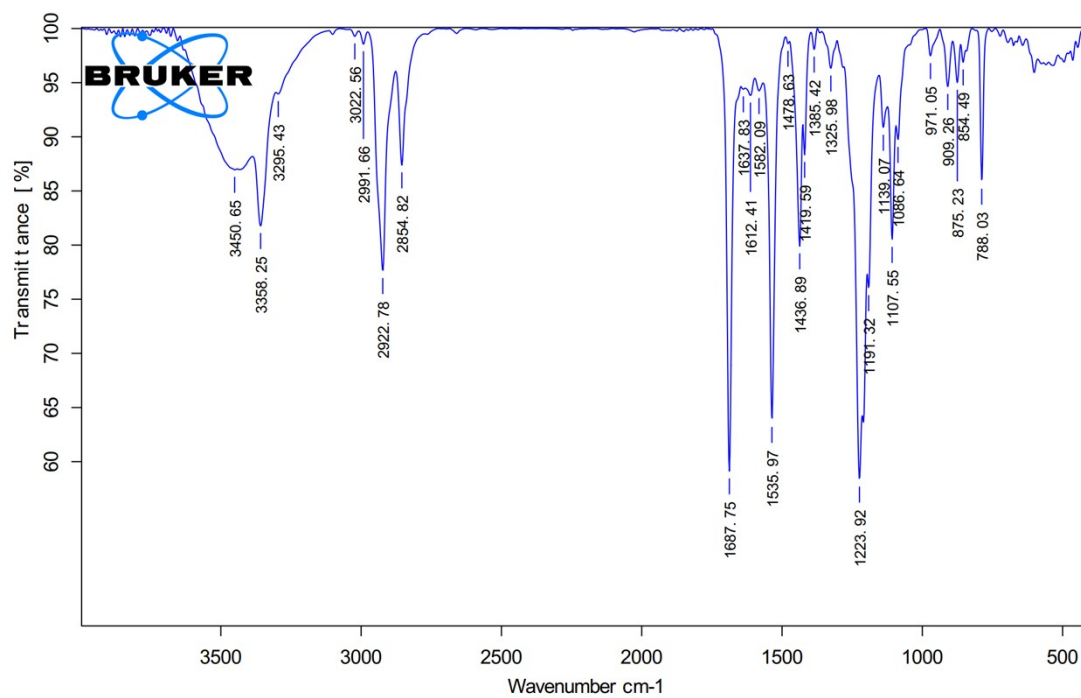

Fig. S3. IR spectrum of compound *R-4*.

## Mass Spectrum List Report

### Analysis Info

Analysis Name D:\Data\ZhengYS\zheng-huming20230914-H1.d  
Method tune\_wide.m  
Sample Name zheng-huming20230914-H1  
Comment

Acquisition Date 9/14/2023 11:12:51 AM

Operator BDAL@DE  
Instrument / Ser# micrOTOF 10401

### Acquisition Parameter

|             |          |                      |          |                  |           |
|-------------|----------|----------------------|----------|------------------|-----------|
| Source Type | ESI      | Ion Polarity         | Positive | Set Nebulizer    | 0.3 Bar   |
| Focus       | Active   |                      |          | Set Dry Heater   | 180 °C    |
| Scan Begin  | 50 m/z   | Set Capillary        | 4500 V   | Set Dry Gas      | 4.0 l/min |
| Scan End    | 3000 m/z | Set End Plate Offset | -500 V   | Set Divert Valve | Waste     |

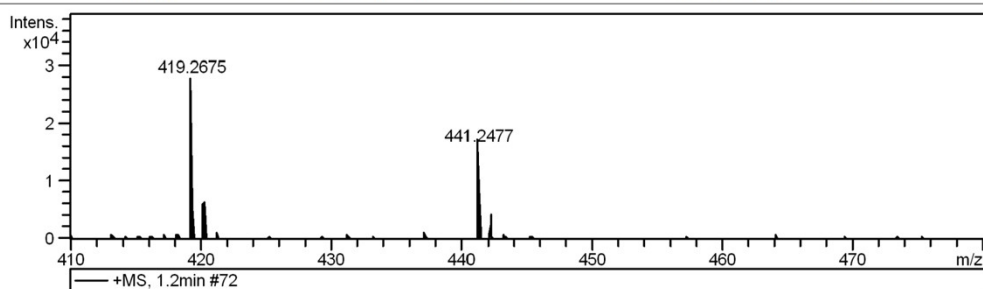

| # | m/z      | Res. | S/N   | I     | FWHM   |
|---|----------|------|-------|-------|--------|
| 1 | 419.2675 | 7257 | 139.7 | 27989 | 0.0578 |
| 2 | 420.2707 | 5811 | 32.8  | 6567  | 0.0723 |
| 3 | 441.2477 | 6106 | 79.0  | 16094 | 0.0723 |
| 4 | 442.2534 | 5708 | 21.2  | 4324  | 0.0775 |

Fig. S4. HRMS spectrum of compound R-4.

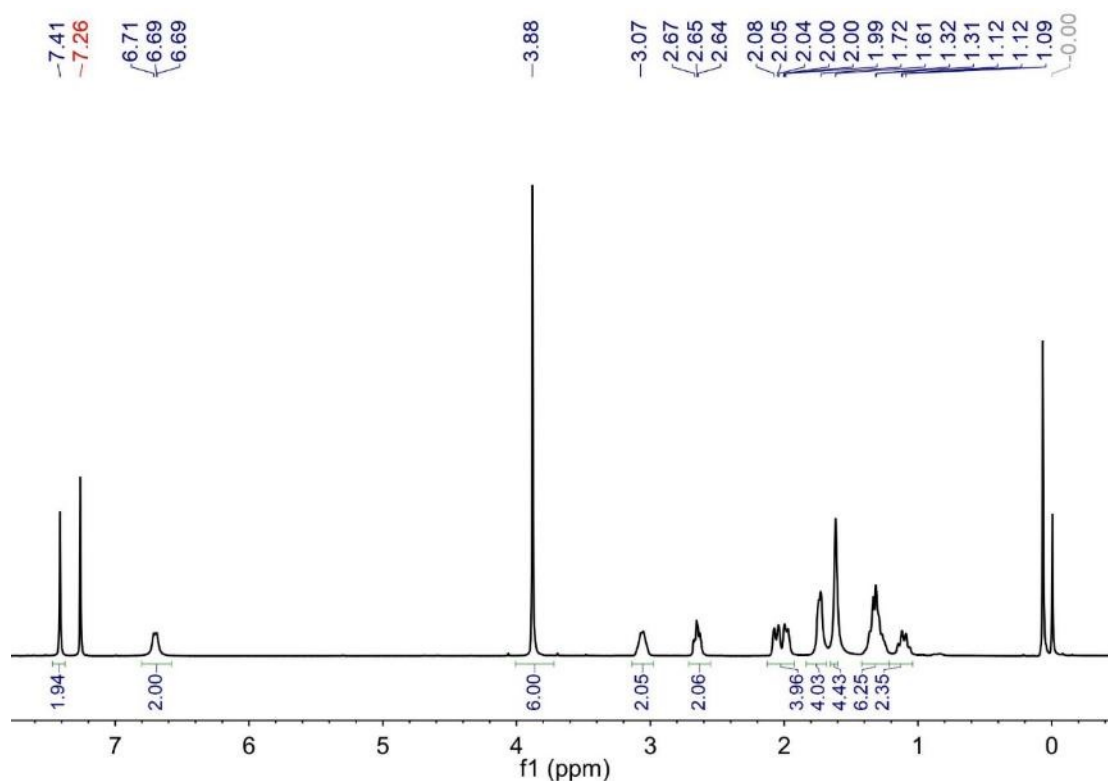

Fig. S5. <sup>1</sup>H NMR spectrum of compound S-4 in CDCl<sub>3</sub>.

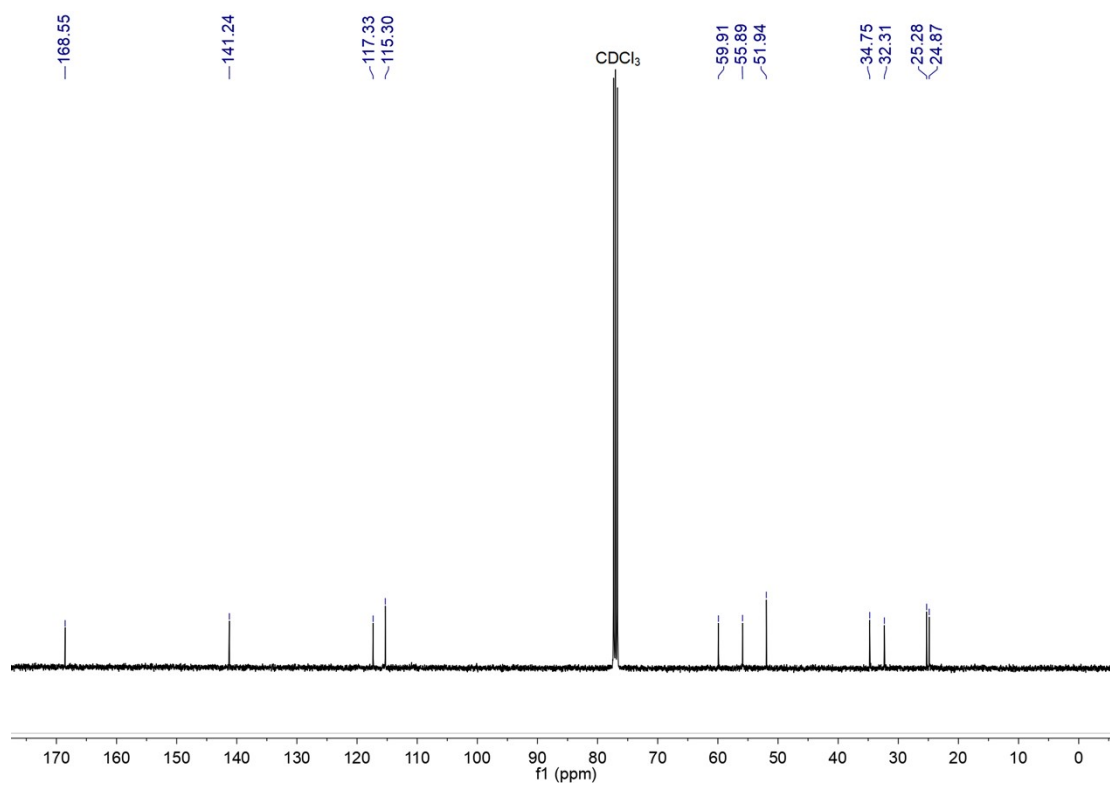

Fig. S6. <sup>13</sup>C NMR spectrum of compound S-4 in CDCl<sub>3</sub>.

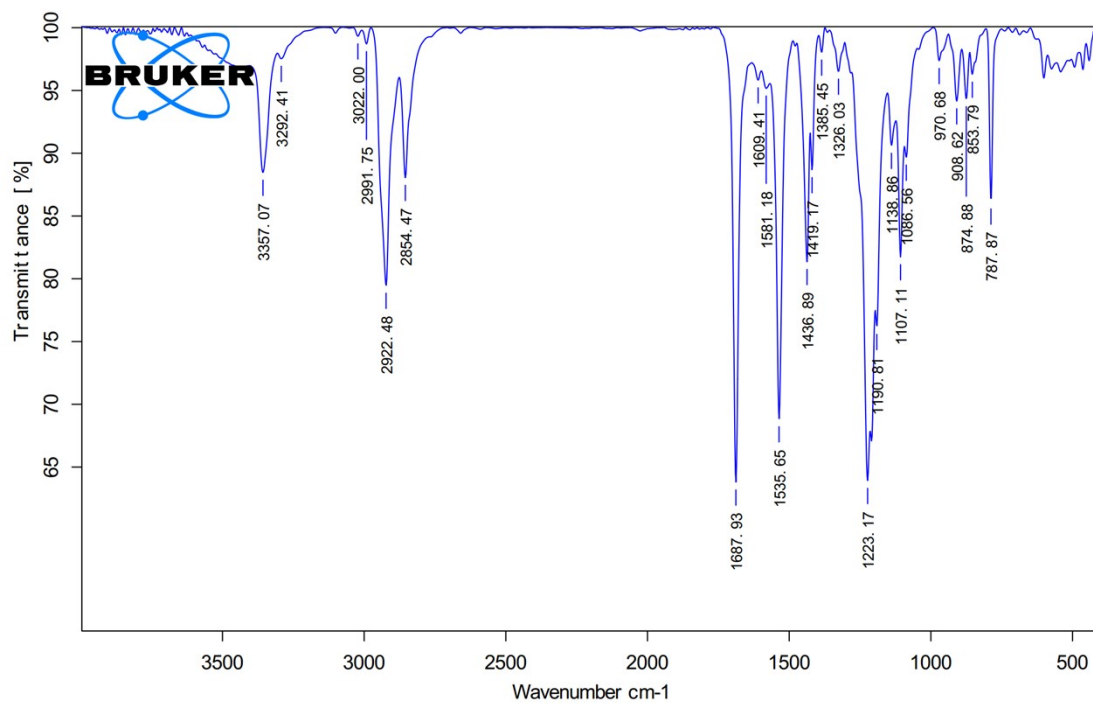

Fig. S7. IR spectrum of compound S-4.

## Mass Spectrum List Report

### Analysis Info

Analysis Name D:\Data\ZhengYS\zheng-huming20231009-1.d  
 Method tune\_wide.m  
 Sample Name zheng-huming20231009-1  
 Comment

Acquisition Date 10/9/2023 2:47:37 PM

Operator BDAL@DE  
 Instrument / Ser# micrOTOF 10401

### Acquisition Parameter

|             |          |                      |          |                  |           |
|-------------|----------|----------------------|----------|------------------|-----------|
| Source Type | ESI      | Ion Polarity         | Positive | Set Nebulizer    | 0.3 Bar   |
| Focus       | Active   |                      |          | Set Dry Heater   | 180 °C    |
| Scan Begin  | 50 m/z   | Set Capillary        | 4500 V   | Set Dry Gas      | 4.0 l/min |
| Scan End    | 3000 m/z | Set End Plate Offset | -500 V   | Set Divert Valve | Waste     |

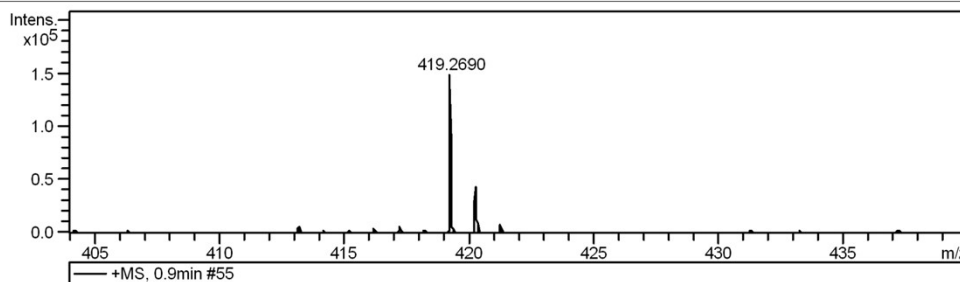

| # | m/z      | Res. | S/N    | I      | FWHM   |
|---|----------|------|--------|--------|--------|
| 1 | 419.2690 | 8213 | 1880.8 | 149487 | 0.0510 |
| 2 | 420.2677 | 6598 | 534.0  | 42446  | 0.0637 |
| 3 | 421.2679 | 6614 | 103.5  | 8226   | 0.0637 |

Fig. S8. HRMS spectrum of compound S-4.

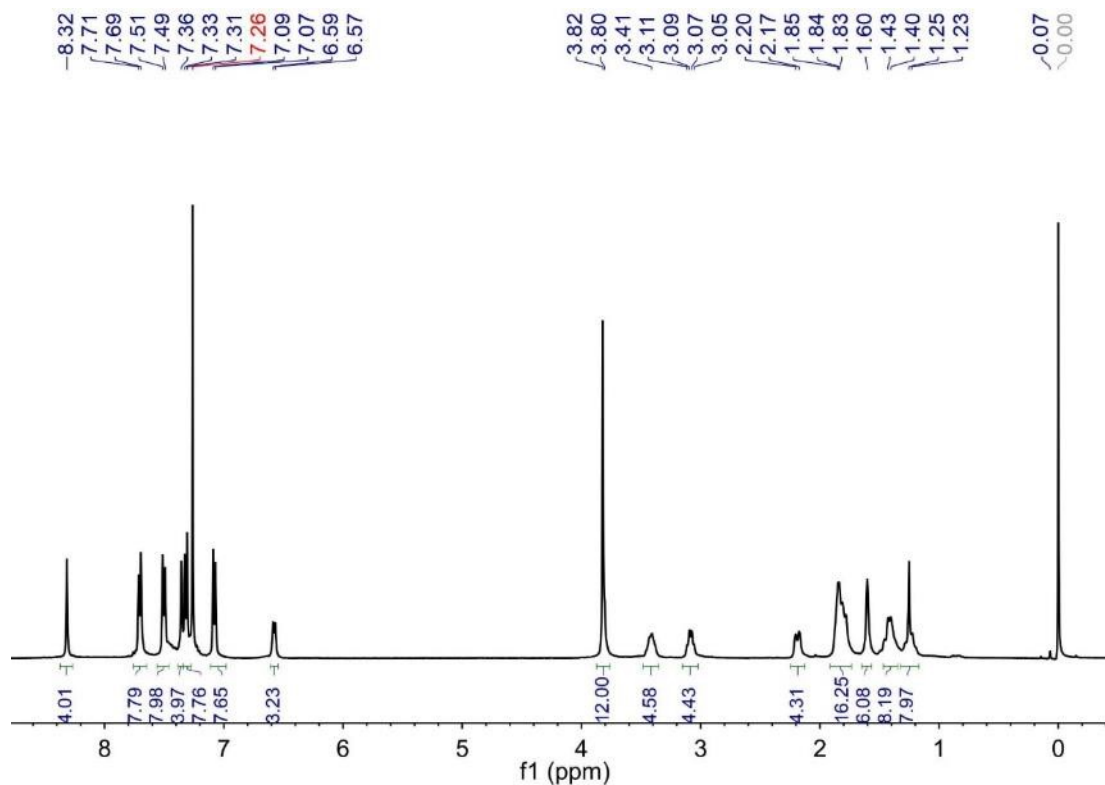

Fig. S9. <sup>1</sup>H NMR spectrum of compound R-6 in CDCl<sub>3</sub>.



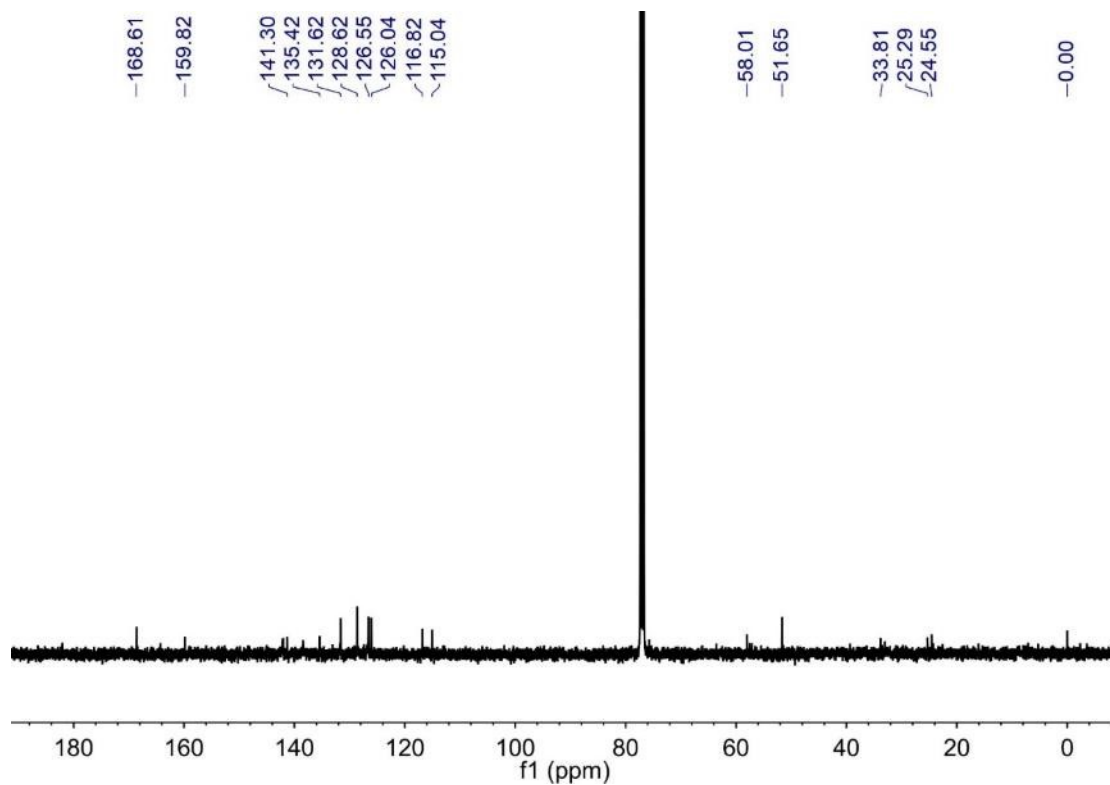

Fig. S10.  $^{13}\text{C}$  NMR spectrum of compound *R-6* in  $\text{CDCl}_3$ .

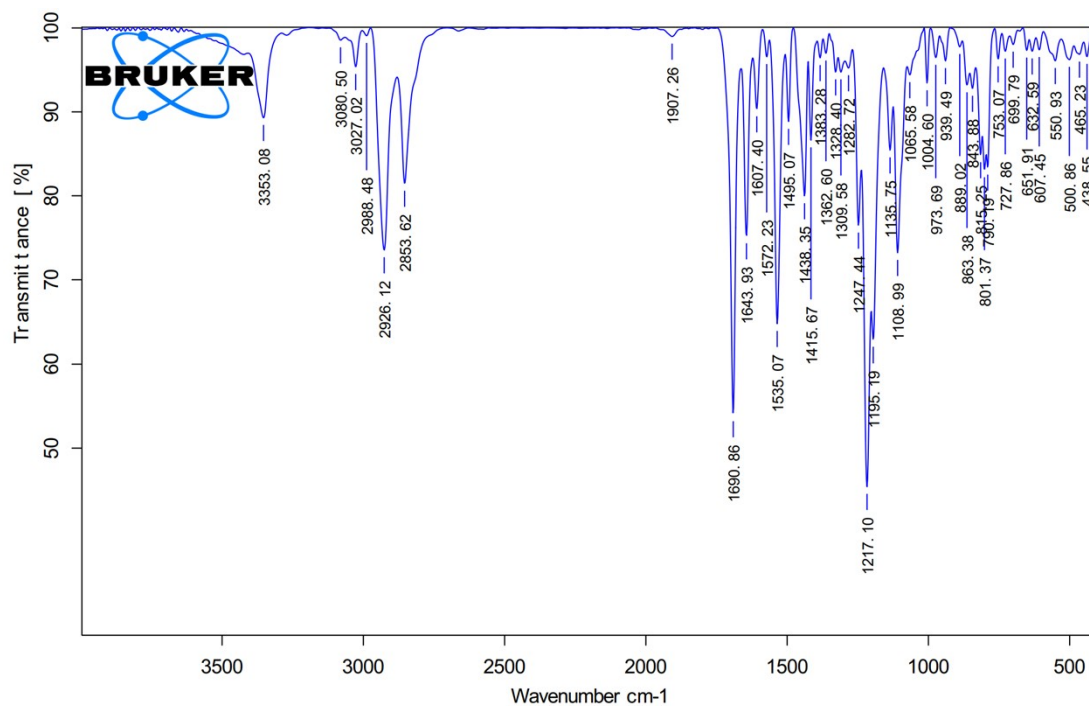

Fig. S11. IR spectrum of compound *R-6*.

## Mass Spectrum List Report

### Analysis Info

Analysis Name D:\Data\ZhengYS\zheng-huming20230914-H5.d  
 Method tune\_wide.m  
 Sample Name zheng-huming20230914-H5  
 Comment

Acquisition Date 9/14/2023 4:22:03 PM

Operator BDAL@DE  
 Instrument / Ser# micrOTOF 10401

### Acquisition Parameter

|             |          |                      |          |                  |           |
|-------------|----------|----------------------|----------|------------------|-----------|
| Source Type | ESI      | Ion Polarity         | Positive | Set Nebulizer    | 0.3 Bar   |
| Focus       | Active   |                      |          | Set Dry Heater   | 180 °C    |
| Scan Begin  | 50 m/z   | Set Capillary        | 4500 V   | Set Dry Gas      | 4.0 l/min |
| Scan End    | 3000 m/z | Set End Plate Offset | -500 V   | Set Divert Valve | Waste     |

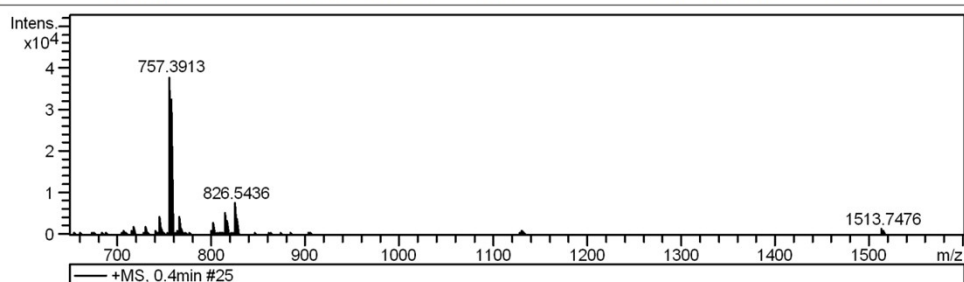

| #  | m/z       | Res. | S/N   | I     | FWHM   |
|----|-----------|------|-------|-------|--------|
| 1  | 745.3393  | 7159 | 27.3  | 3988  | 0.1041 |
| 2  | 757.3913  | 5987 | 240.3 | 34545 | 0.1265 |
| 3  | 757.8953  | 5934 | 225.4 | 32389 | 0.1277 |
| 4  | 758.3972  | 5959 | 122.5 | 17585 | 0.1273 |
| 5  | 758.8989  | 5527 | 44.0  | 6316  | 0.1373 |
| 6  | 766.3978  | 6206 | 28.2  | 4010  | 0.1235 |
| 7  | 802.9029  | 7038 | 22.1  | 2996  | 0.1141 |
| 8  | 826.5436  | 7407 | 58.1  | 7616  | 0.1116 |
| 9  | 1513.7476 | 8237 | 23.6  | 1456  | 0.1838 |
| 10 | 1514.7663 | 7039 | 22.2  | 1345  | 0.2152 |
| 11 | 1515.7614 | 8171 | 11.8  | 716   | 0.1855 |

Fig. S12. HRMS spectrum of compound R-6.

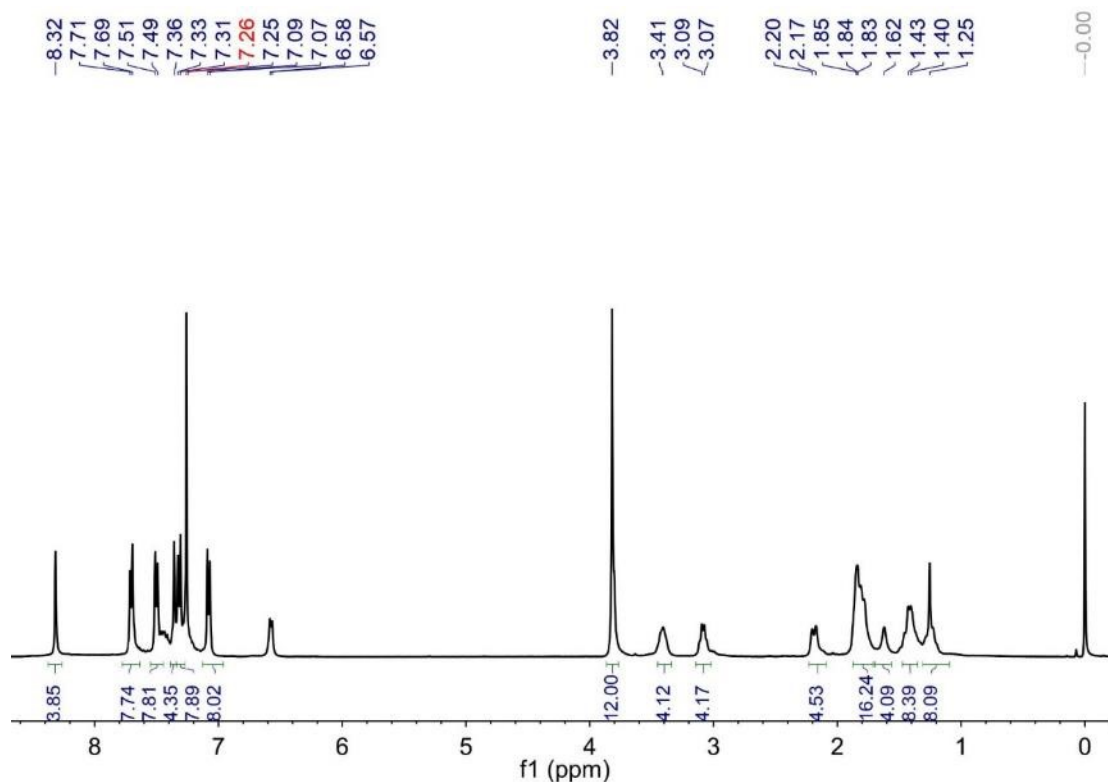

Fig. S13. <sup>1</sup>H NMR spectrum of compound S-6 in CDCl<sub>3</sub>.

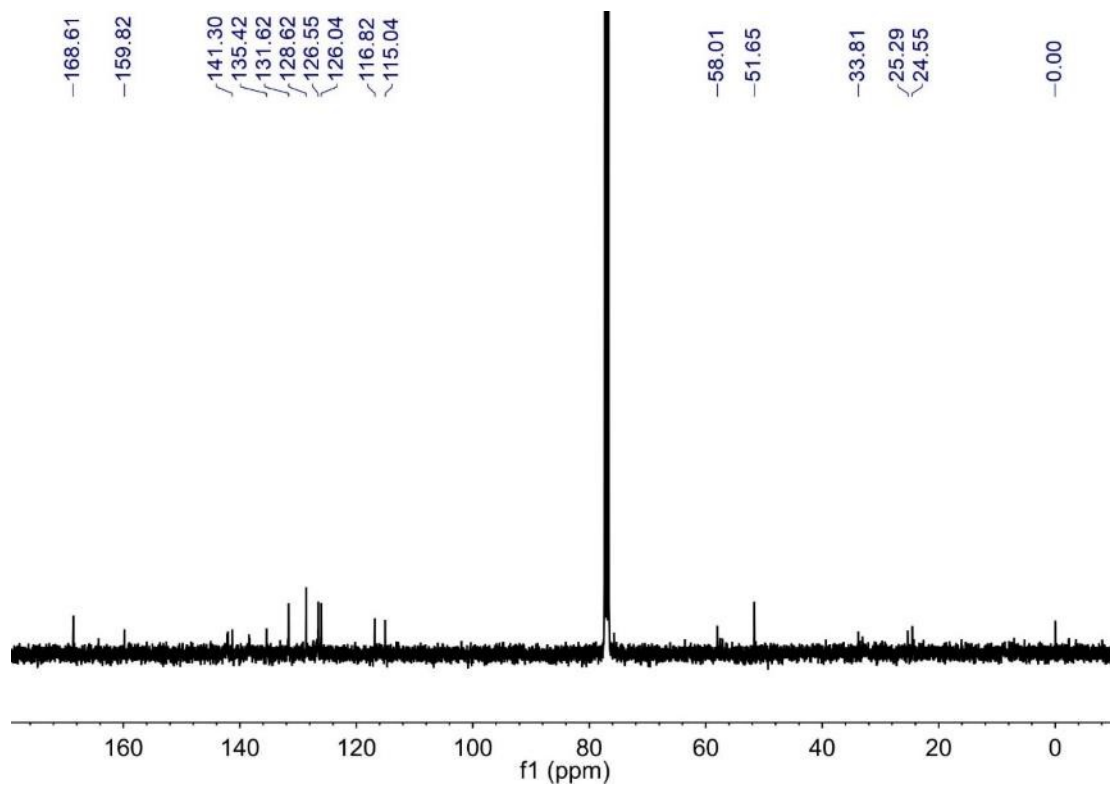

Fig. S14.  $^{13}\text{C}$  NMR spectrum of compound *S-6* in  $\text{CDCl}_3$ .

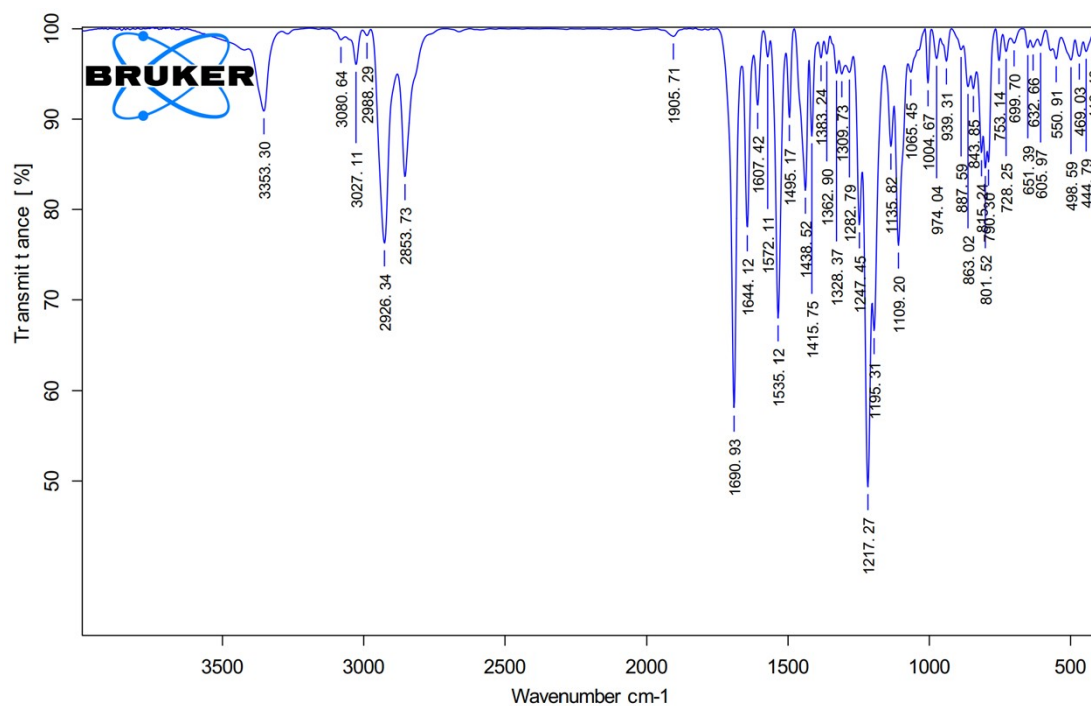

Fig. S15. IR spectrum of compound *S-6*.

## Mass Spectrum List Report

|                      |                                          |                   |                      |
|----------------------|------------------------------------------|-------------------|----------------------|
| <b>Analysis Info</b> |                                          | Acquisition Date  | 10/9/2023 2:54:01 PM |
| Analysis Name        | D:\Data\ZhengYS\zheng-huming20231009-2.d | Operator          | BDAL@DE              |
| Method               | tune_wide.m                              | Instrument / Ser# | micrOTOF 10401       |
| Sample Name          | zheng-huming20231009-2                   |                   |                      |
| Comment              |                                          |                   |                      |

|                              |          |                      |          |                  |           |
|------------------------------|----------|----------------------|----------|------------------|-----------|
| <b>Acquisition Parameter</b> |          |                      |          |                  |           |
| Source Type                  | ESI      | Ion Polarity         | Positive | Set Nebulizer    | 0.3 Bar   |
| Focus                        | Active   |                      |          | Set Dry Heater   | 180 °C    |
| Scan Begin                   | 50 m/z   | Set Capillary        | 4500 V   | Set Dry Gas      | 4.0 l/min |
| Scan End                     | 3000 m/z | Set End Plate Offset | -500 V   | Set Divert Valve | Waste     |

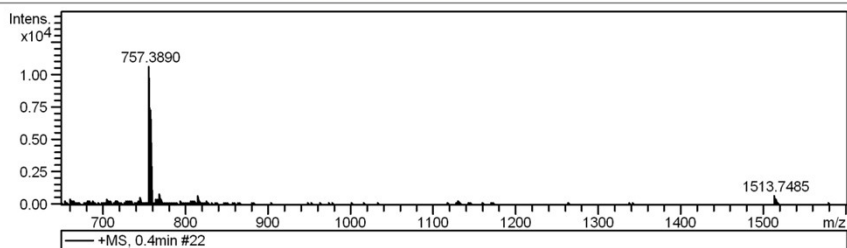

| #  | m/z       | Res.  | S/N   | I     | FWHM   |
|----|-----------|-------|-------|-------|--------|
| 1  | 756.3792  | 5740  | 48.8  | 3916  | 0.1318 |
| 2  | 756.8881  | 5964  | 118.7 | 8808  | 0.1269 |
| 3  | 757.3890  | 5500  | 143.7 | 10655 | 0.1377 |
| 4  | 757.8934  | 4976  | 99.0  | 7333  | 0.1523 |
| 5  | 758.3959  | 5089  | 45.4  | 3359  | 0.1490 |
| 6  | 758.8878  | 7093  | 19.4  | 1435  | 0.1070 |
| 7  | 1512.7552 | 7555  | 8.8   | 328   | 0.2002 |
| 8  | 1513.7485 | 7268  | 19.6  | 730   | 0.2083 |
| 9  | 1514.7478 | 7160  | 10.5  | 390   | 0.2115 |
| 10 | 1515.7697 | 10957 | 6.3   | 236   | 0.1383 |
| 11 | 1516.8078 | 13156 | 4.2   | 155   | 0.1153 |

Fig. S16. HRMS spectrum of compound S-6.

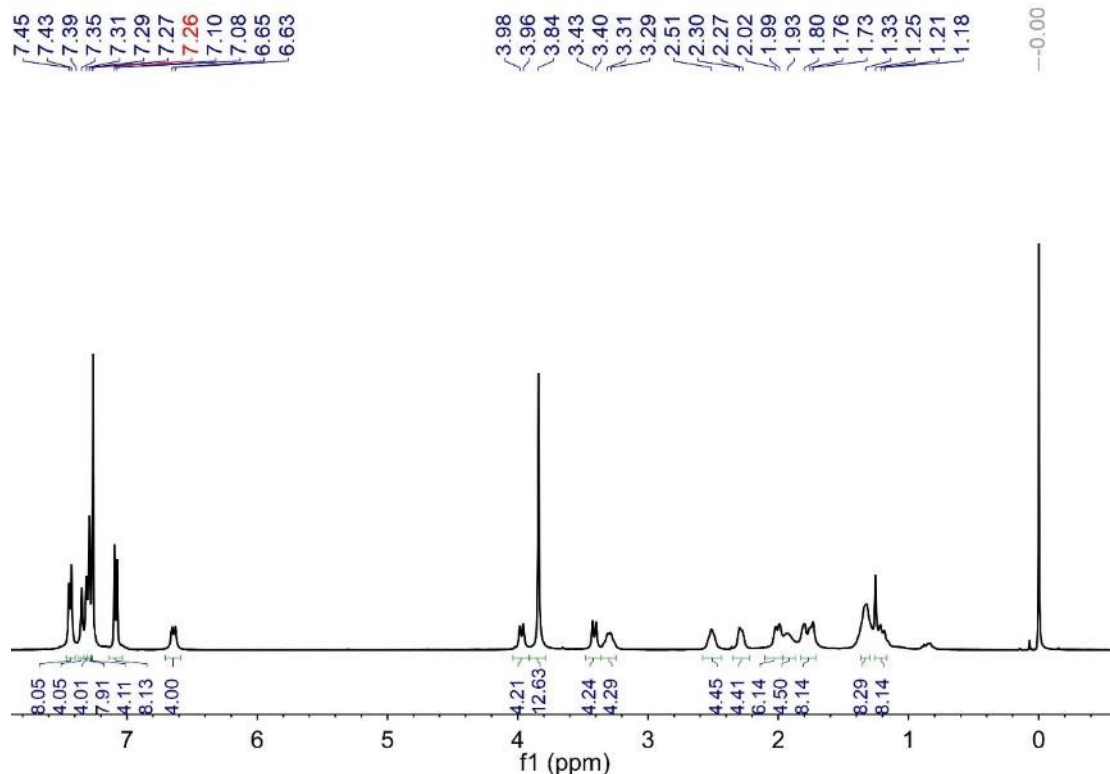

Fig. S17. <sup>1</sup>H NMR spectrum of compound R-7 in CDCl<sub>3</sub>.

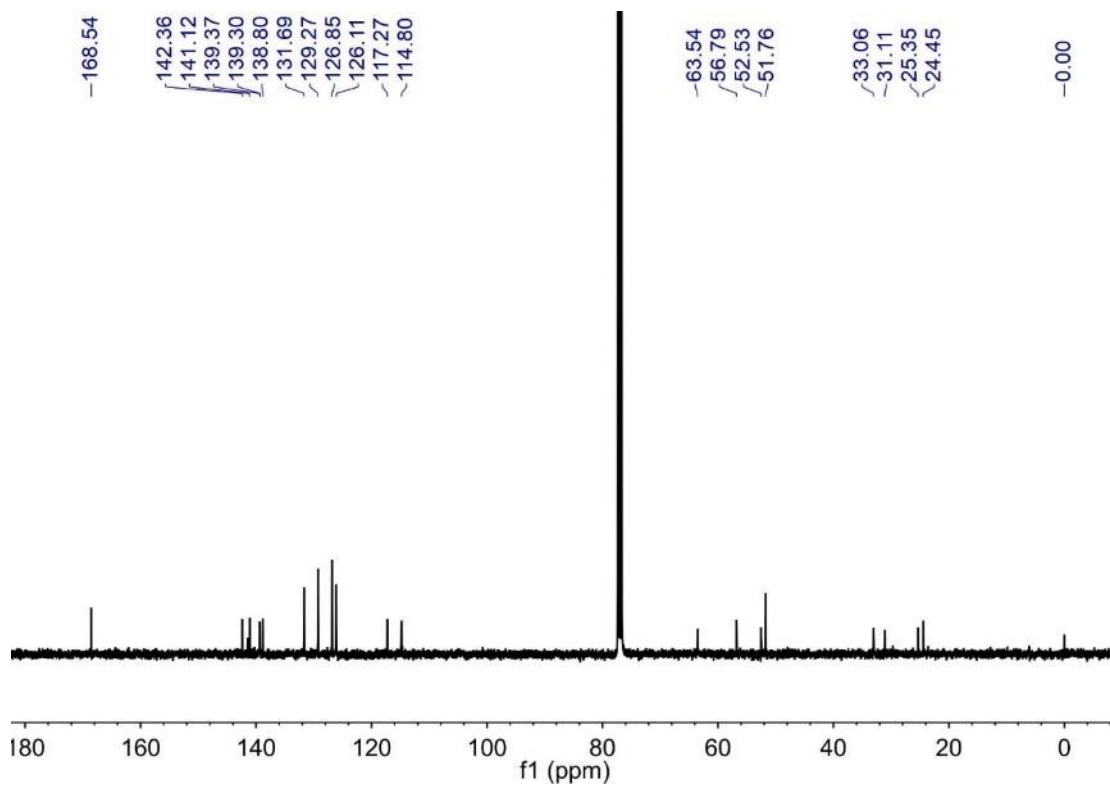

Fig. S18.  $^{13}\text{C}$  NMR spectrum of compound *R-7* in  $\text{CDCl}_3$ .

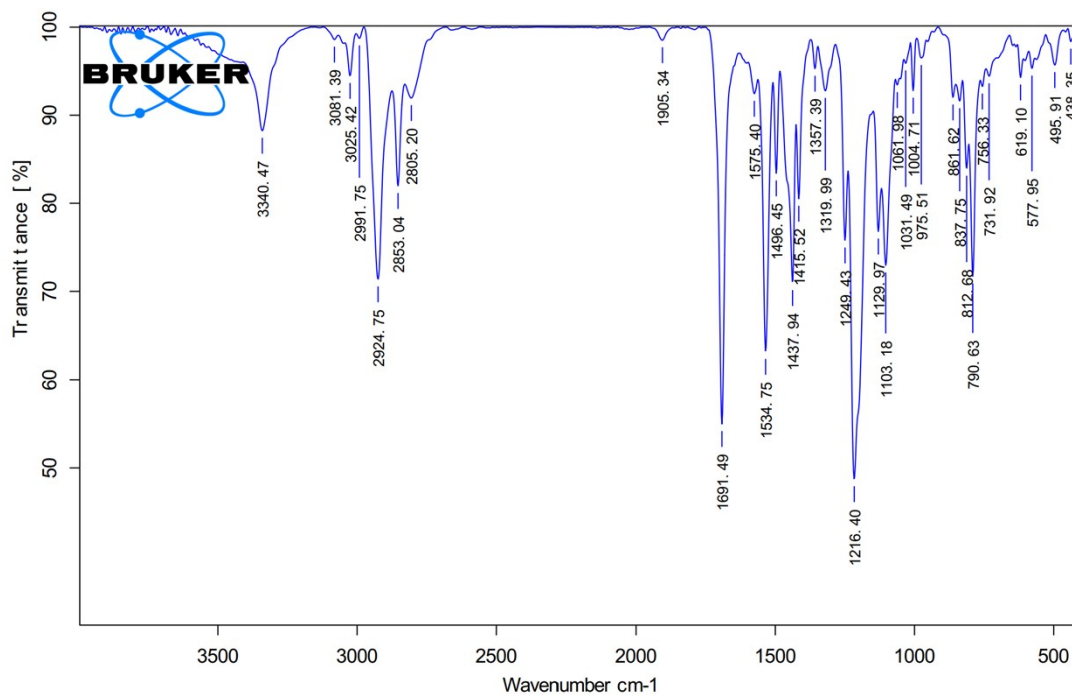

Fig. S19. IR spectrum of compound *R-7*.

## Mass Spectrum List Report

| Analysis Info |                                             | Acquisition Date     |                |
|---------------|---------------------------------------------|----------------------|----------------|
| Analysis Name | D:\Data\ZhengYS\zheng-huming20230914-H6-1.d | 9/14/2023 4:53:34 PM |                |
| Method        | tune_wide.m                                 | Operator             | BDAL@DE        |
| Sample Name   | zheng-huming20230914-H6-1                   | Instrument / Ser#    | micrOTOF 10401 |
| Comment       |                                             |                      |                |

  

| Acquisition Parameter |          |                      |          |                  |           |
|-----------------------|----------|----------------------|----------|------------------|-----------|
| Source Type           | ESI      | Ion Polarity         | Positive | Set Nebulizer    | 0.3 Bar   |
| Focus                 | Active   |                      |          | Set Dry Heater   | 180 °C    |
| Scan Begin            | 50 m/z   | Set Capillary        | 4500 V   | Set Dry Gas      | 4.0 l/min |
| Scan End              | 3000 m/z | Set End Plate Offset | -500 V   | Set Divert Valve | Waste     |

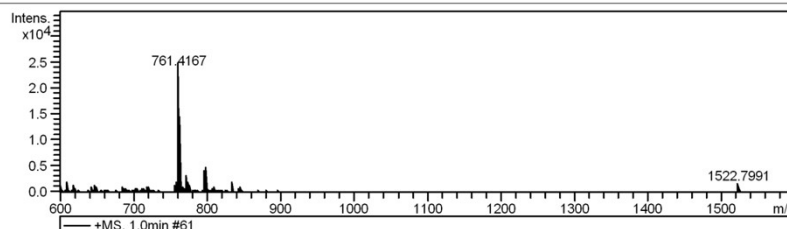

| #  | m/z       | Res. | S/N   | I     | FWHM   |
|----|-----------|------|-------|-------|--------|
| 1  | 761.4167  | 6179 | 236.7 | 23659 | 0.1232 |
| 2  | 761.9201  | 5863 | 231.1 | 23077 | 0.1300 |
| 3  | 762.4210  | 5810 | 144.8 | 14446 | 0.1312 |
| 4  | 762.9222  | 5903 | 56.4  | 5623  | 0.1293 |
| 5  | 772.4075  | 6215 | 29.6  | 2911  | 0.1243 |
| 6  | 772.9104  | 5246 | 26.2  | 2571  | 0.1473 |
| 7  | 797.4301  | 6776 | 44.4  | 4194  | 0.1177 |
| 8  | 797.9297  | 6604 | 49.2  | 4649  | 0.1208 |
| 9  | 833.9413  | 5529 | 18.4  | 1632  | 0.1508 |
| 10 | 1521.8028 | 6701 | 24.6  | 1255  | 0.2271 |
| 11 | 1522.7991 | 8226 | 31.5  | 1567  | 0.1851 |
| 12 | 1523.8131 | 7986 | 17.1  | 848   | 0.1908 |

Fig. S20. HRMS spectrum of compound *R*-7.

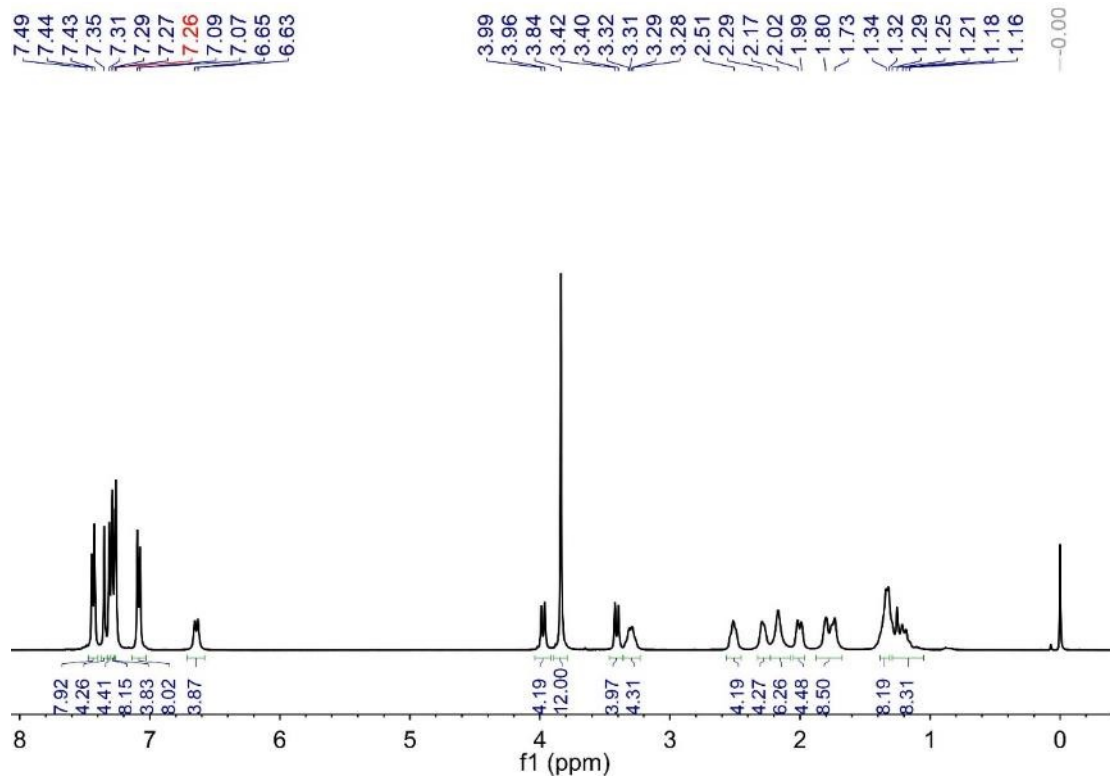

Fig. S21. <sup>1</sup>H NMR spectrum of compound *S*-7 in CDCl<sub>3</sub>.

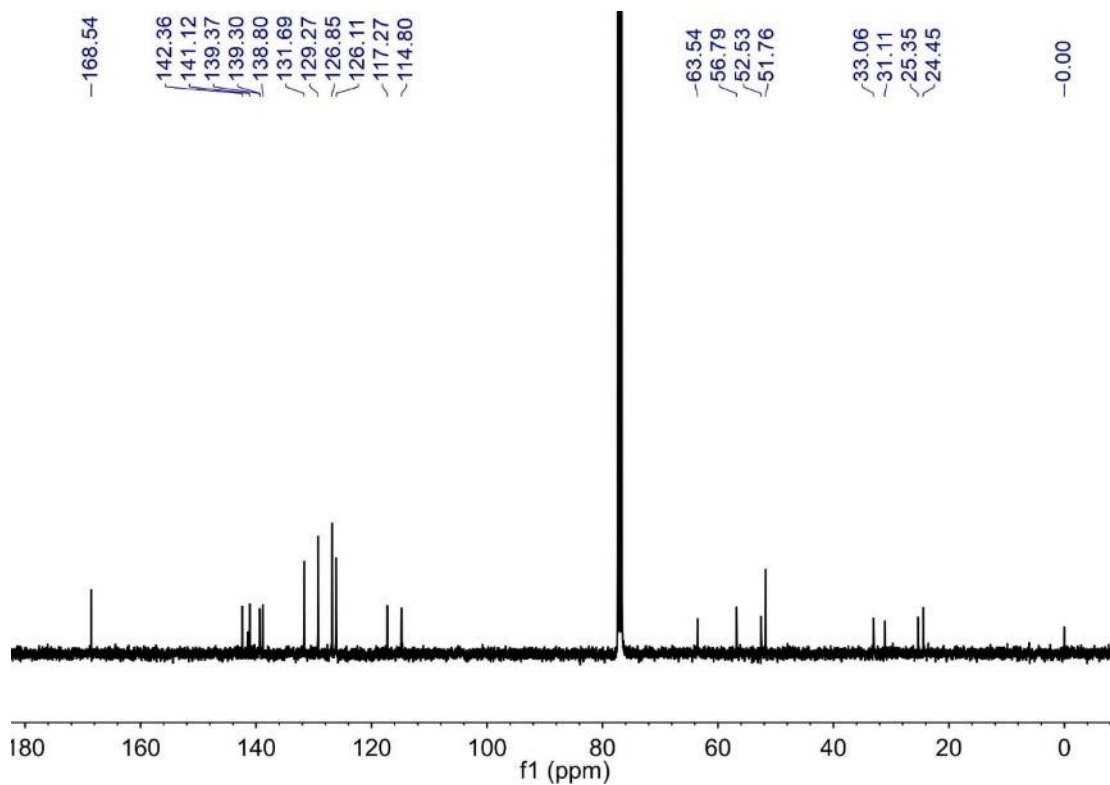

Fig. S22.  $^{13}\text{C}$  NMR spectrum of compound *S-7* in  $\text{CDCl}_3$ .

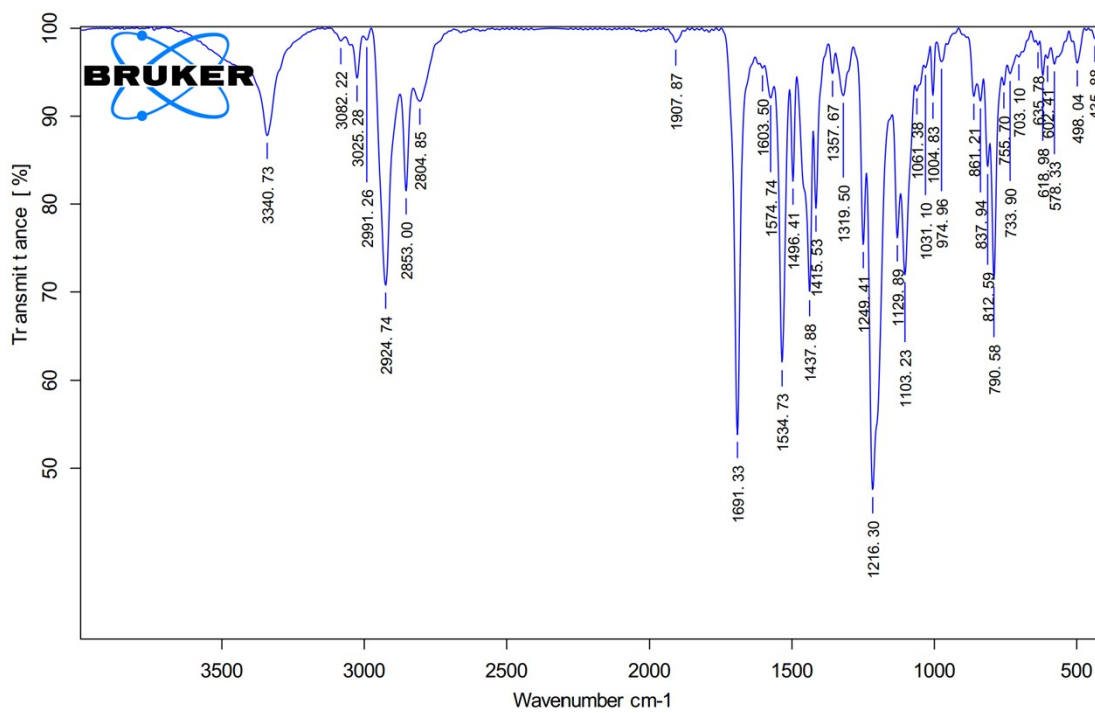

Fig. S23. IR spectrum of compound *S-7*.

## Mass Spectrum List Report

**Analysis Info**  
Analysis Name D:\Data\ZhengYS\zheng-huming20231009-3.d  
Method tune\_wide.m  
Sample Name zheng-huming20231009-3  
Comment

Acquisition Date 10/9/2023 3:00:59 PM  
Operator BDAL@DE  
Instrument / Ser# micrOTOF 10401

**Acquisition Parameter**

|             |          |                      |          |                  |           |
|-------------|----------|----------------------|----------|------------------|-----------|
| Source Type | ESI      | Ion Polarity         | Positive | Set Nebulizer    | 0.3 Bar   |
| Focus       | Active   |                      |          | Set Dry Heater   | 180 °C    |
| Scan Begin  | 50 m/z   | Set Capillary        | 4500 V   | Set Dry Gas      | 4.0 l/min |
| Scan End    | 3000 m/z | Set End Plate Offset | -500 V   | Set Divert Valve | Waste     |

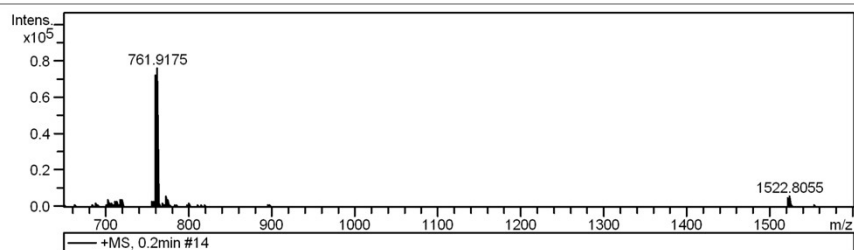

| # | m/z       | Res. | S/N   | I     | FWHM   |
|---|-----------|------|-------|-------|--------|
| 1 | 761.4163  | 5828 | 410.9 | 66830 | 0.1307 |
| 2 | 761.9175  | 6545 | 467.8 | 76016 | 0.1164 |
| 3 | 762.4191  | 5828 | 263.5 | 42770 | 0.1308 |
| 4 | 762.9202  | 5231 | 110.2 | 17867 | 0.1459 |
| 5 | 1521.7936 | 7591 | 62.1  | 5103  | 0.2005 |
| 6 | 1522.8055 | 5384 | 68.9  | 5631  | 0.2829 |
| 7 | 1523.8079 | 8257 | 35.9  | 2941  | 0.1845 |
| 8 | 1524.8108 | 6484 | 14.5  | 1186  | 0.2352 |

Fig. S24. HRMS spectrum of compound *S-7*.

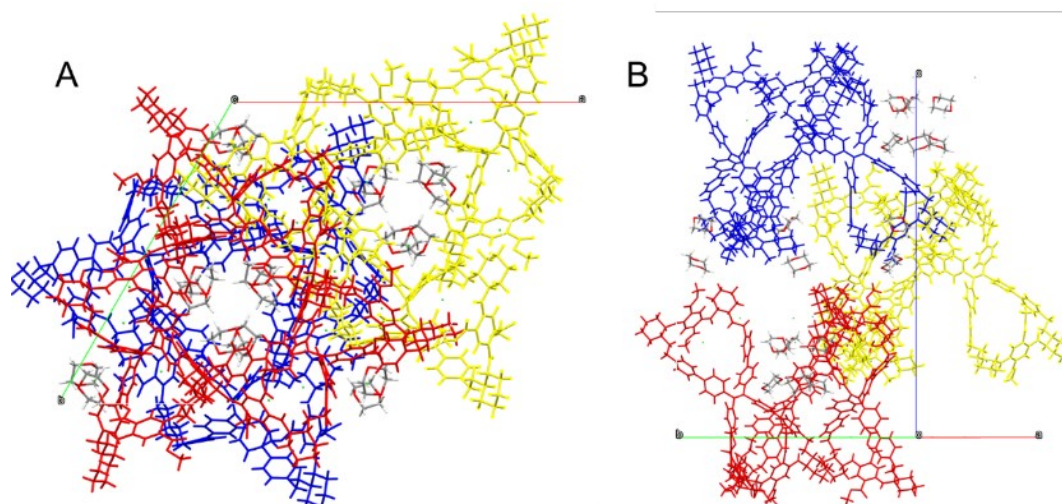

Fig. S25. The top view (A) and side view (B) of crystal cell of *R-7* hydrochloride (solvent molecules: 1,4-dioxane).



## CD, CPL and SEM of TPE bimacrocycle 6

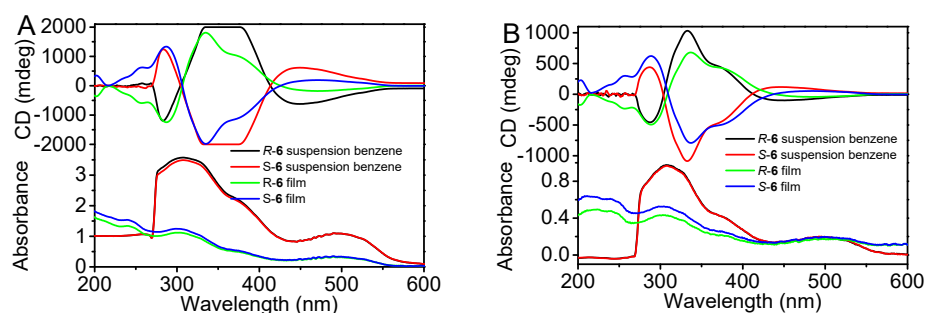

**Fig. S26.** CD and absorption spectra of suspension of *R*-6 and *S*-6 in benzene and in a drop-coating film (A) at  $1.0 \times 10^{-3}$  M and (B) at  $2.0 \times 10^{-4}$  M.

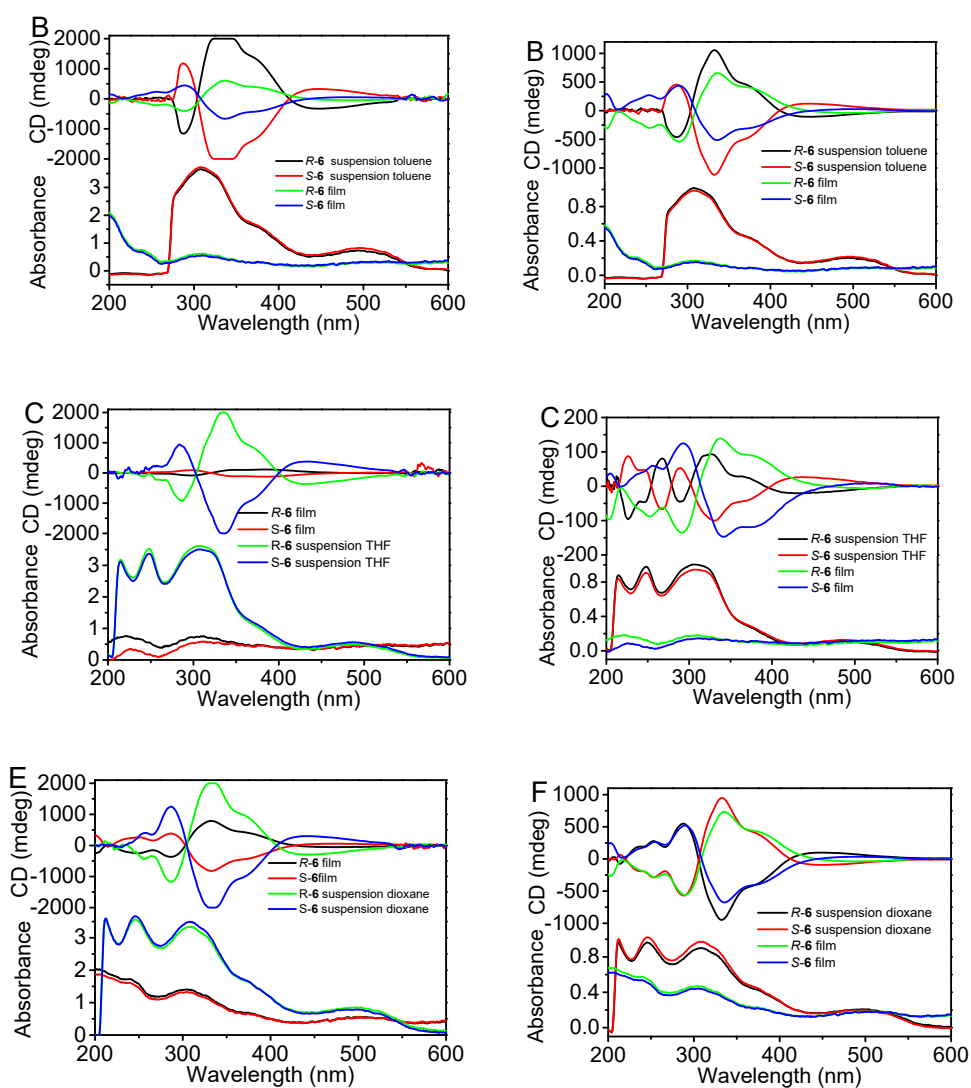

**Fig. S27.** CD and absorption spectra of suspension of *R*-6 and *S*-6 in toluene at  $5.0 \times 10^{-4}$  M (A) and  $2.0 \times 10^{-4}$  M (B), in THF at  $5.0 \times 10^{-4}$  M (C) and  $2.0 \times 10^{-4}$  M (D), in 1,4-dioxane at  $5.0 \times 10^{-4}$  M (E) and  $2.0 \times 10^{-4}$  M (F) as well as in a drop-coating film prepared from corresponding suspension.

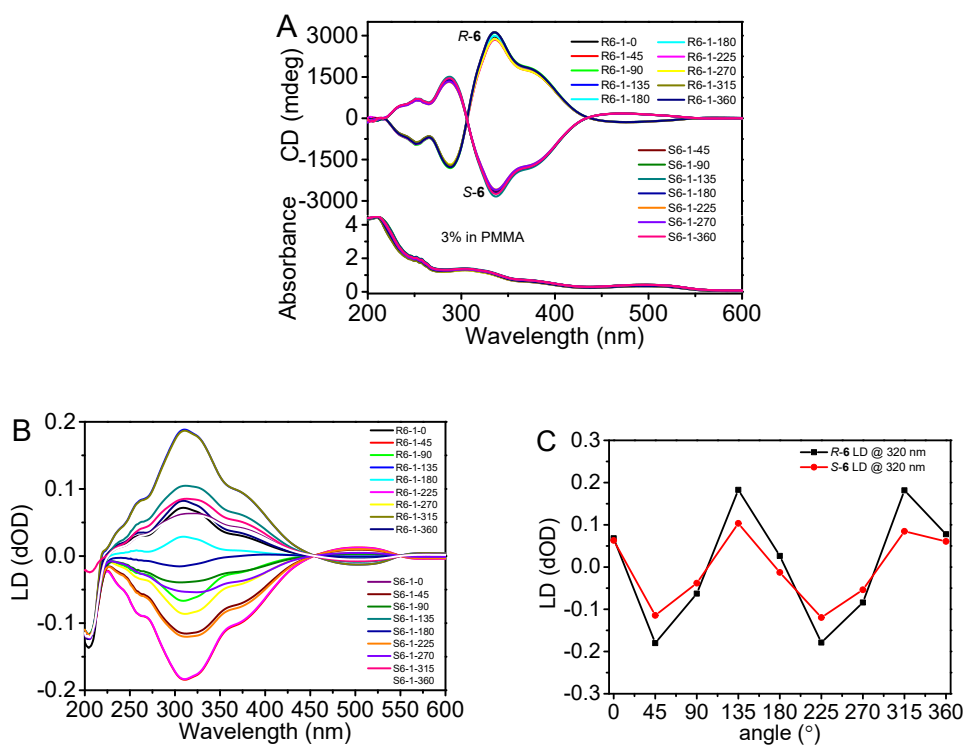

**Fig. S28.** Change in CD (A) and LD (B) spectra of R-6 / S-6 in PMMA films with different angles, and Intensity of LD vs angles (C). 3 weight% of 6 in PMMA.

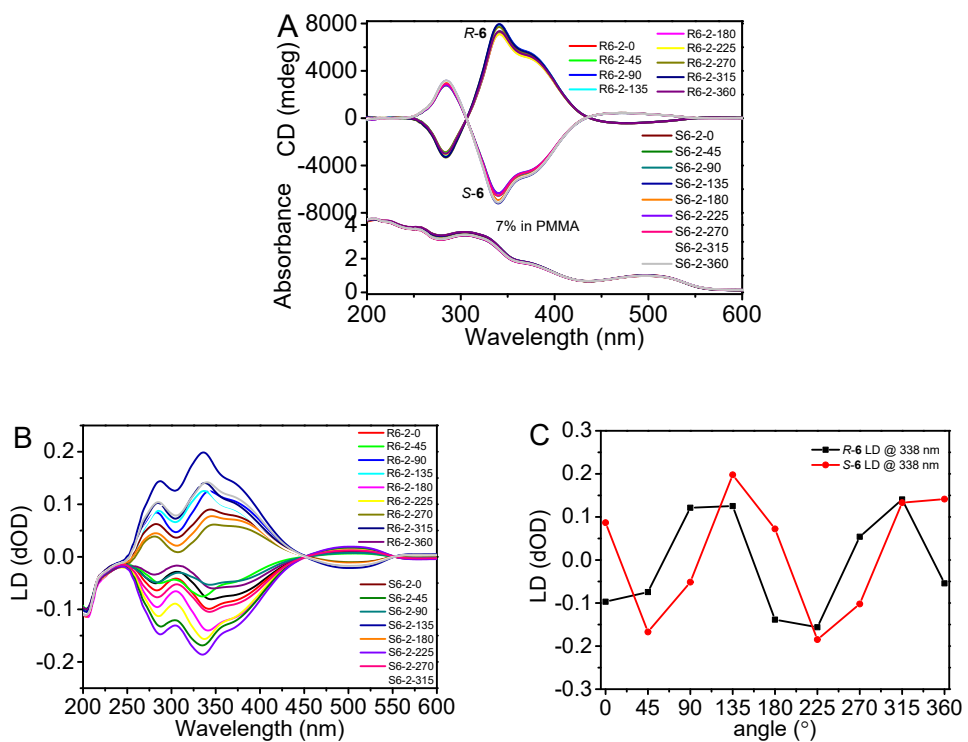

**Fig. S29.** Change in CD (A) and LD (B) spectra of R-6 / S-6 in PMMA films with different angles, and Intensity of LD vs angles (C). 7 weight% of 6 in PMMA.

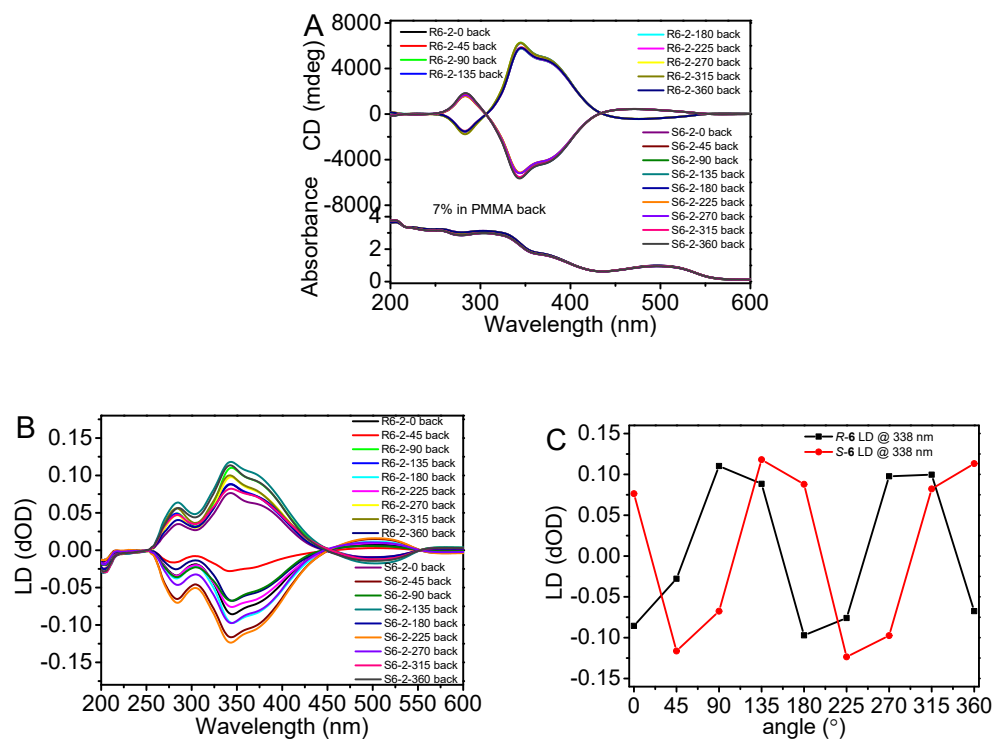

**Fig. S30.** In the back of the PMMA film, change in CD (A) and LD (B) spectra of R-6 / S-6 in PMMA films with different angles, and Intensity of LD vs angles (C). 7 weight% of 6 in PMMA.

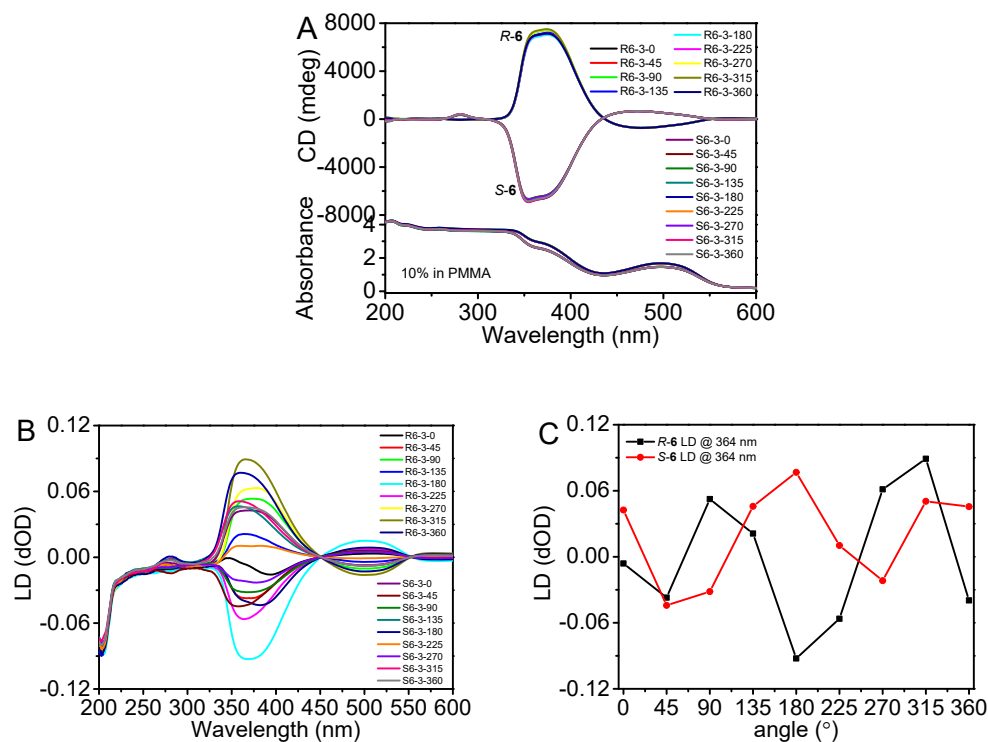

**Fig. S31.** Change in CD (A) and LD (B) spectra of R-6 / S-6 in PMMA films with different angles, and Intensity of LD vs angles (C). 10 weight% of 6 in PMMA.

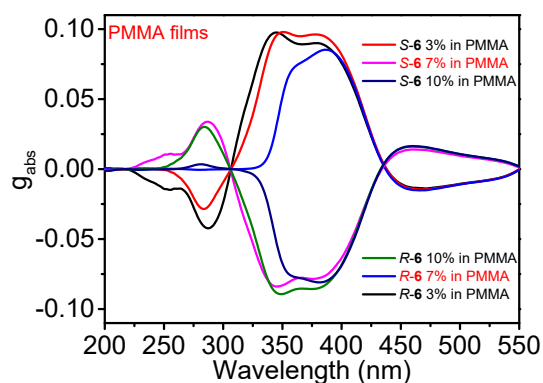

**Fig. S32.** Changing of  $g_{\text{abs}}$  with wavelength of *R-6* or *S-6* in PMMA films and weight% of **6** in PMMA.

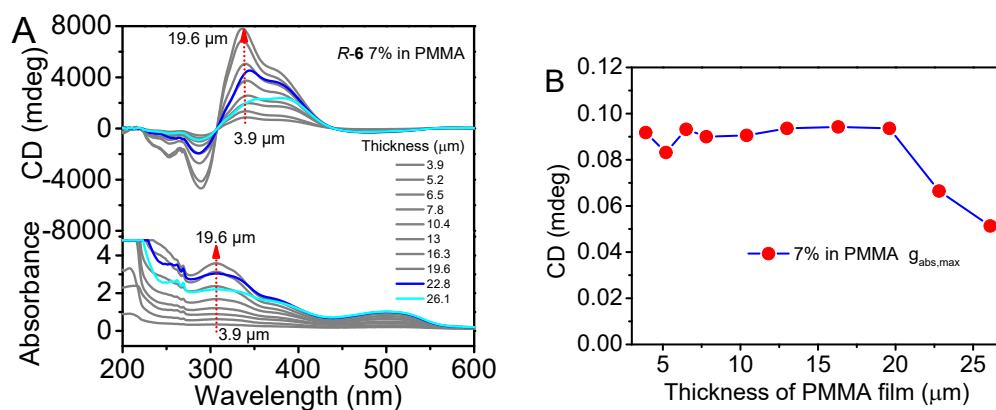

**Fig. S33.** Change in CD and adsorption spectra (A) and maximum of  $g_{\text{abs}}$  (B) of *R-6* in PMMA films with different thickness. 7 weight% of **6** in PMMA

The preparation method for PMMA films involves initially creating a toluene solution of PMMA at a concentration of 30 mg/mL. Subsequently, a corresponding amount of compound **6** or **7** is weighed based on the mass ratio between **6** or **7** and PMMA, and dispersed into the solution. The mixture is then homogenized through 30 minutes of ultrasonication to form a uniform emulsion. Using a pipette, an appropriate volume (from 60  $\mu\text{L}$  to 400  $\mu\text{L}$ ) of the blended emulsion is evenly dispensed onto a  $2 \times 2 \text{ cm}^2$  quartz substrate. Upon evaporation of toluene, a uniformly thick PMMA film with an area of  $4 \text{ cm}^2$  is obtained.

The approximate thickness of the PMMA film can be calculated based on the mass of PMMA (neglecting the added mass of compound **6** or **7**), density of PMMA (1.15 g/mL), and the film's area ( $4 \text{ cm}^2$ ). For instance, if 300  $\mu\text{L}$  of the mixed solution are used for film preparation, the PMMA mass amounts to 9 mg, resulting in a calculated film thickness of approximately 19.6  $\mu\text{m}$ .

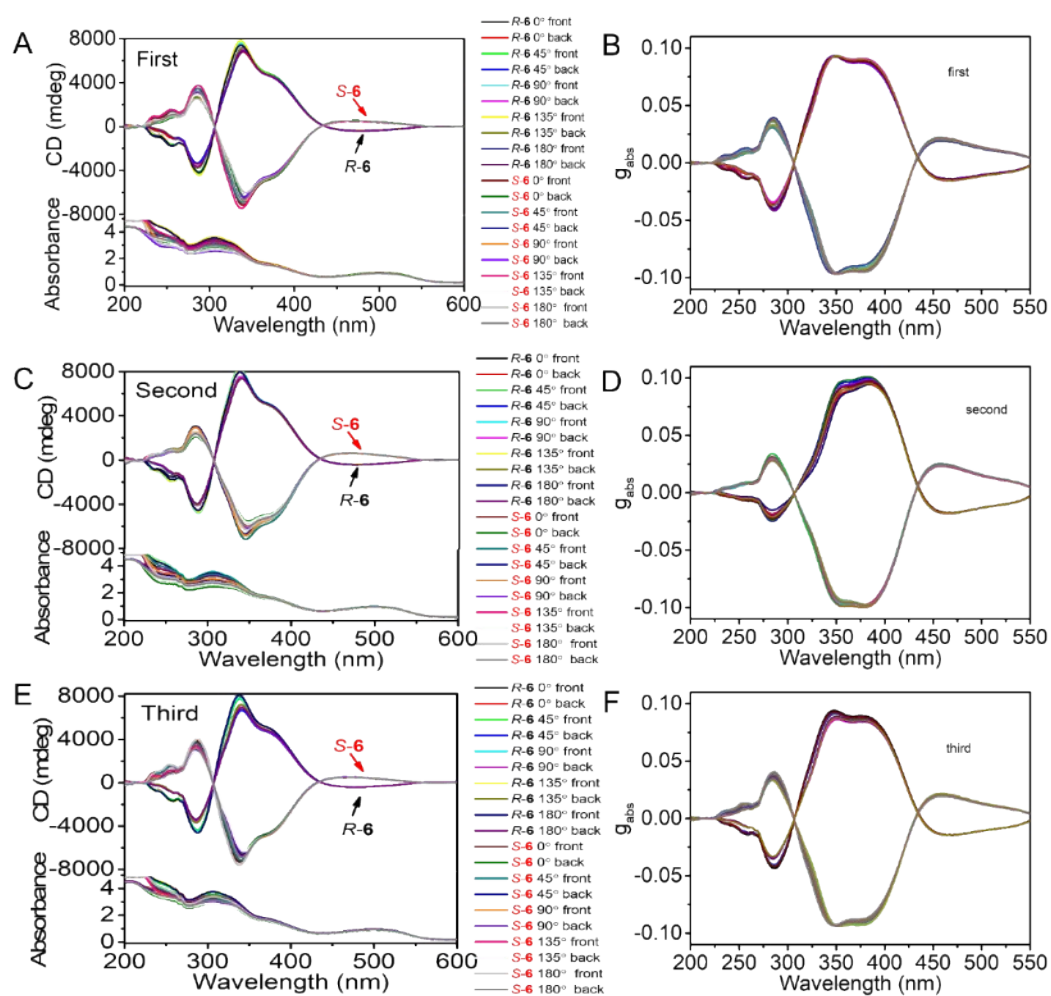

**Fig. S34.** Change in CD spectra (A, C, E) and change of  $g_{\text{abs}}$  with wavelength (B, D, F) of *R-6* / *S-6* in PMMA films with different angles. 7 weight% of **6** in PMMA, thickness 19.6  $\mu\text{m}$ . Parallel experiments were carried out on three groups of newly prepared PMMA films.

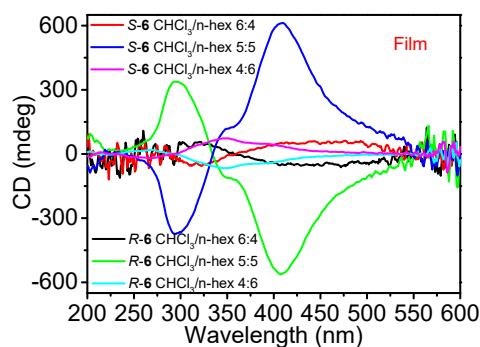

**Fig. S35.** CD spectra of drop-coating films of *R-6* and *S-6* in  $\text{CHCl}_3/\text{n-hexane}$  mixed solvent at different solvent ratios.  $[\mathbf{6}] = 2.0 \times 10^{-3} \text{ M}$ .

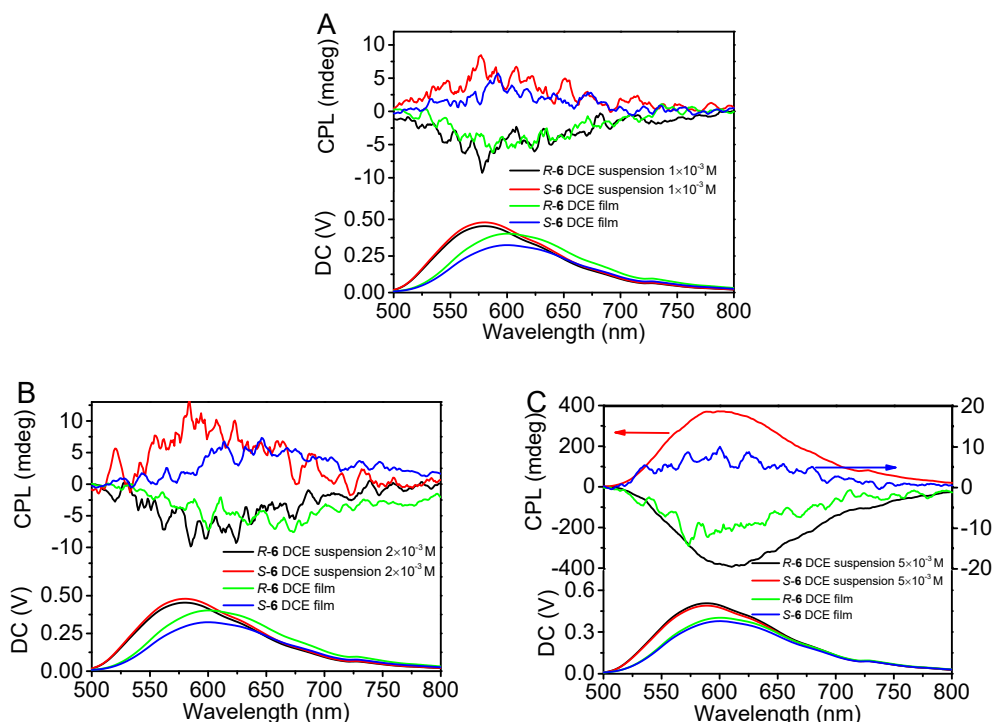

**Fig. S36.** CPL spectra of suspension of *R*-6 and *S*-6 in DCE at different concentration and in a drop-coating film (A) [6] = 1.0 × 10<sup>-3</sup> M, (B) [6] = 2.0 × 10<sup>-3</sup> M, (C) [6] = 5.0 × 10<sup>-3</sup> M, (λ<sub>ex</sub> = 350 nm).

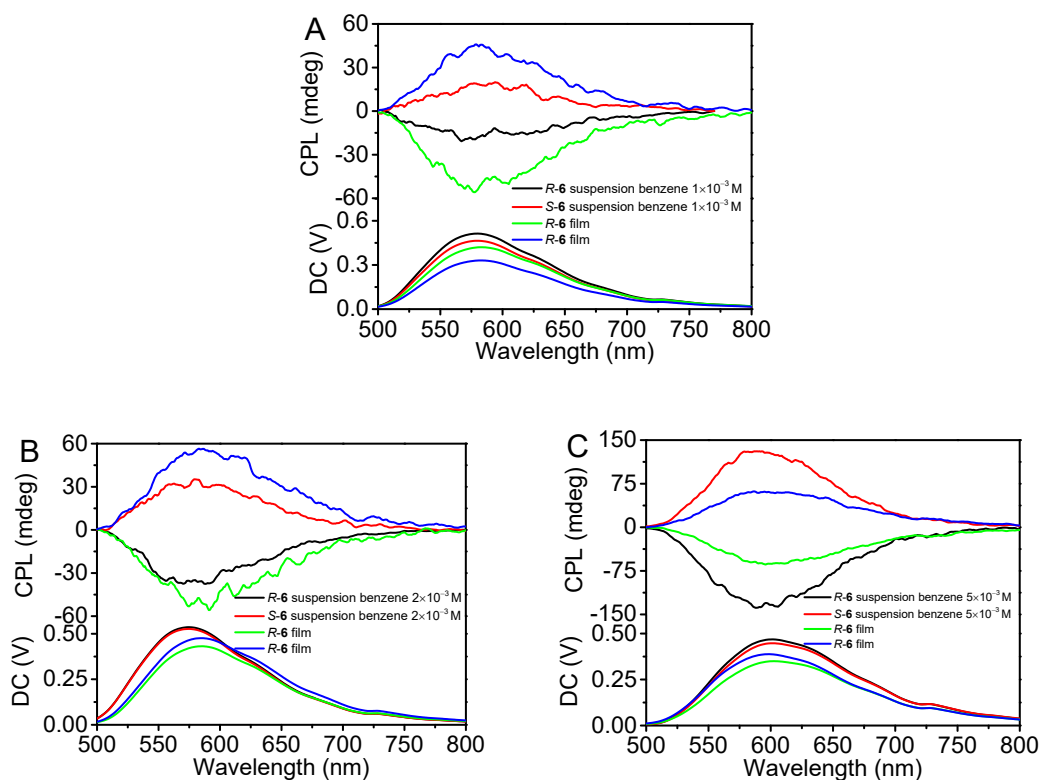

**Fig. S37.** CPL spectra of suspension of *R*-6 and *S*-6 in benzene and in a drop-coating film, (A) [6] = 1.0 × 10<sup>-3</sup> M, (B) [6] = 2.0 × 10<sup>-3</sup> M, (C) [6] = 5.0 × 10<sup>-3</sup> M. λ<sub>ex</sub> = 350 nm.

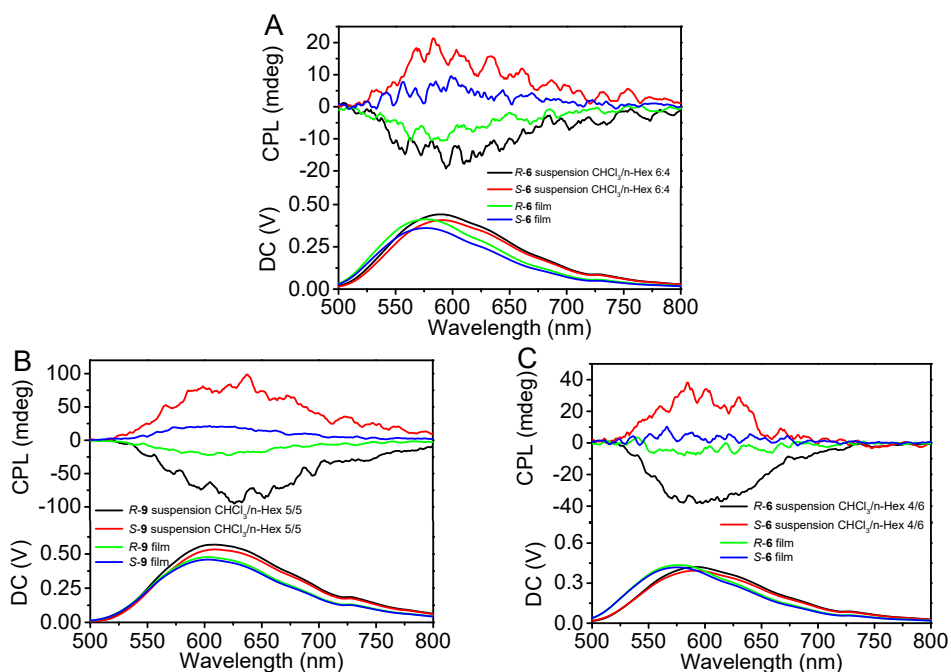

**Fig. S38.** CPL spectra of *R*-6 and *S*-6 in  $\text{CHCl}_3/\text{n-hexane}$  mixed solvent at different solvent ratios and in a drop-coating film (A)  $\text{CHCl}_3/\text{n-hexane}$  6:4, (B)  $\text{CHCl}_3/\text{n-hexane}$  5:5, (C)  $\text{CHCl}_3/\text{n-hexane}$  4:6.  $\lambda_{\text{ex}} = 350 \text{ nm}$ ,  $[\mathbf{6}] = 2.0 \times 10^{-3} \text{ M}$ .

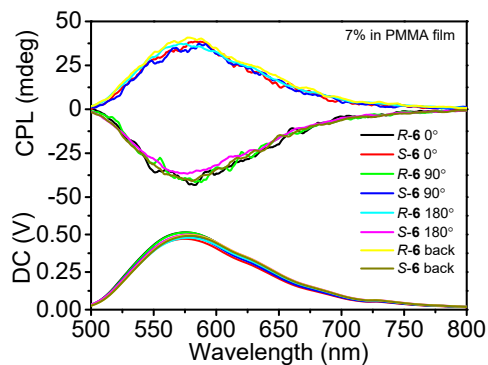

**Fig. S39.** Change in CPL spectra of *R*-6 and *S*-6 in PMMA film with different angles and faces. weight%,  $\lambda_{\text{ex}} = 350 \text{ nm}$ .

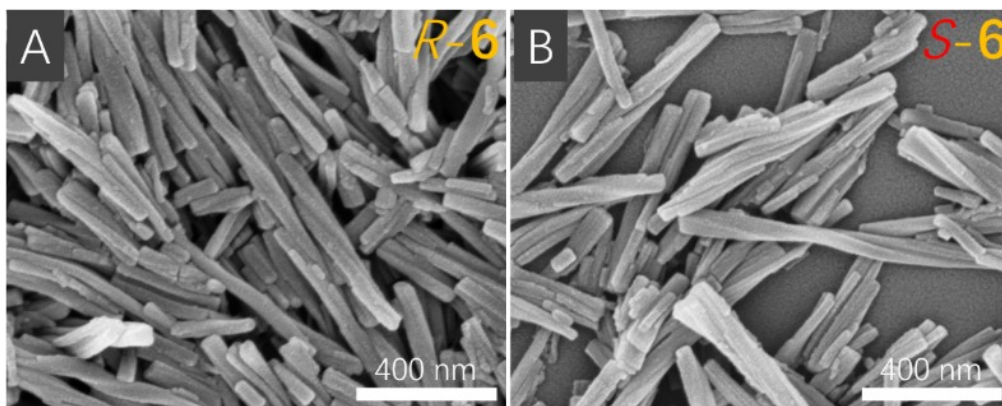

**Fig. S40.** SEM images of suspension of *R*-6 and *S*-6 in benzene.  $[6] = 5.0 \times 10^{-4}$  M.

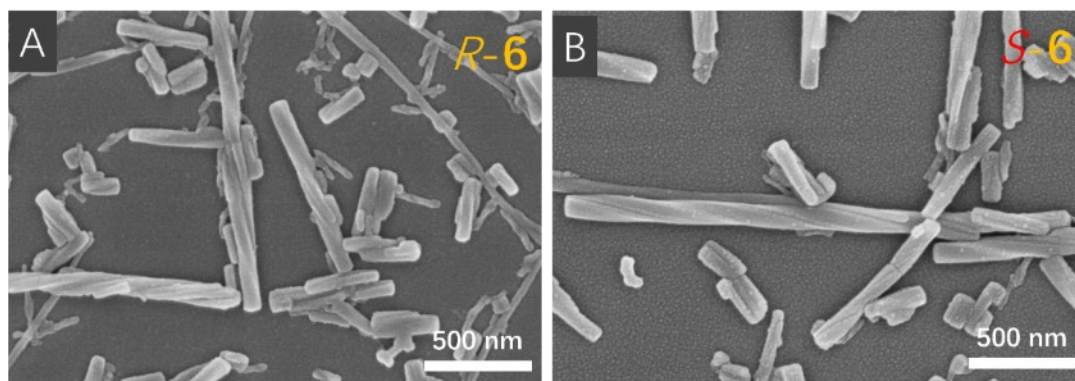

**Fig. S41.** SEM images of *R*-6 and *S*-6 in DCE suspension.  $[6] = 5.0 \times 10^{-4}$  M.



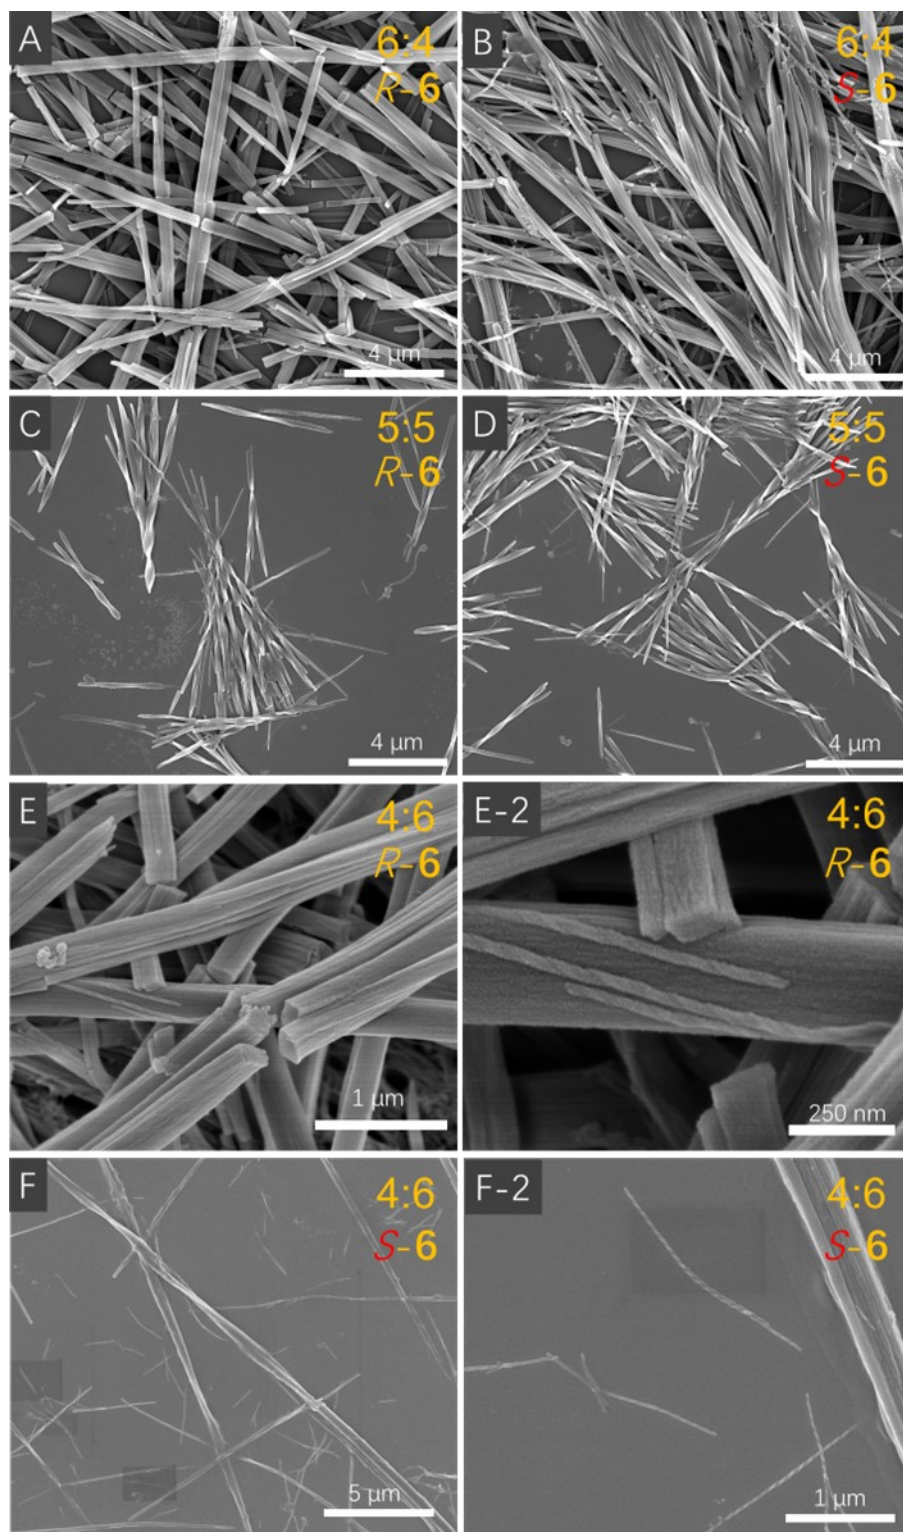

**Fig. S42.** SEM images of *R*-6 or *S*-6 in (A, B) CHCl<sub>3</sub>/n-hexane 6:4, (C, D) CHCl<sub>3</sub>/n-hexane 5:5, (E, F) CHCl<sub>3</sub>/n-hexane 4:6. [6] = 2.0 × 10<sup>-3</sup> M.

### CD, CPL, SEM, and TEM of TPE bimacrocycle 7

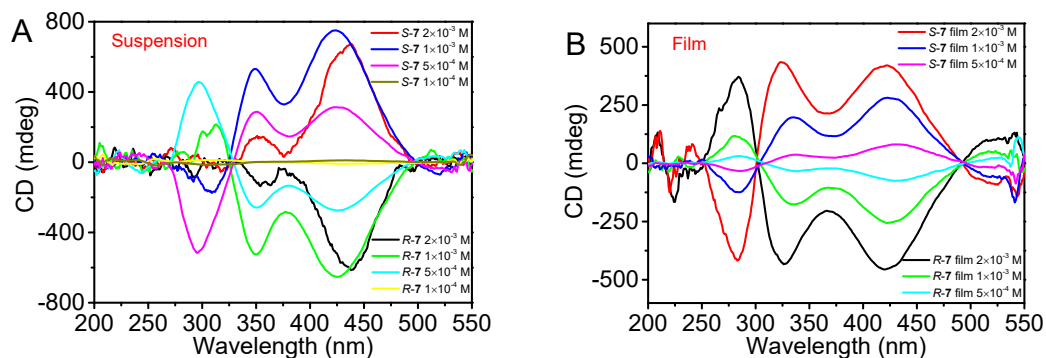

**Fig. S43.** CD spectra of suspension of *R*-7 and *S*-7 in DCE at different concentration (A) and in a drop-coating film (B).

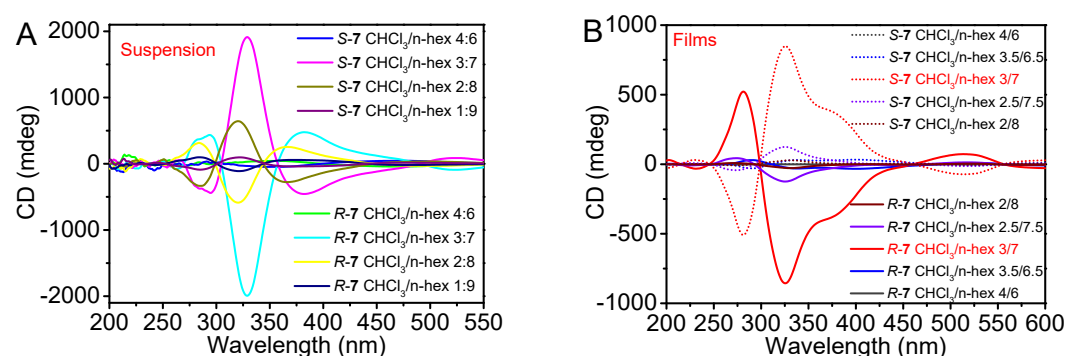

**Fig. S44.** CD spectra of *R*-7 and *S*-7 in  $\text{CHCl}_3/\text{n-hexane}$  mixed solvent at different solvent ratios (A) and in drop-coating films (B).  $[7] = 1.0 \times 10^{-3} \text{ M}$ .

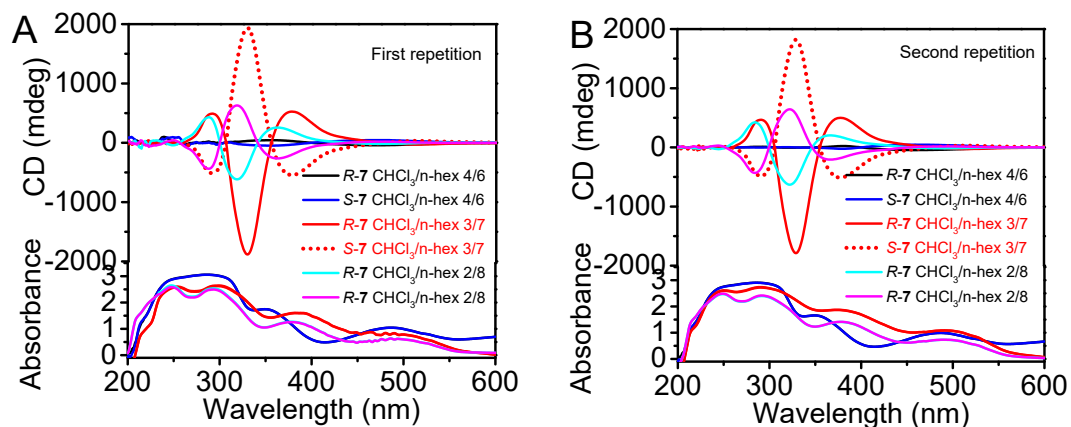

**Fig. S45.** CD and adsorption spectra of *R*-7 and *S*-7 in  $\text{CHCl}_3/\text{n-hexane}$  mixed solvent at different solvent ratios of the first (A) and second (B) parallel experiments.  $[7] = 1.0 \times 10^{-3} \text{ M}$ , spectra measured from two independent sets of samples.

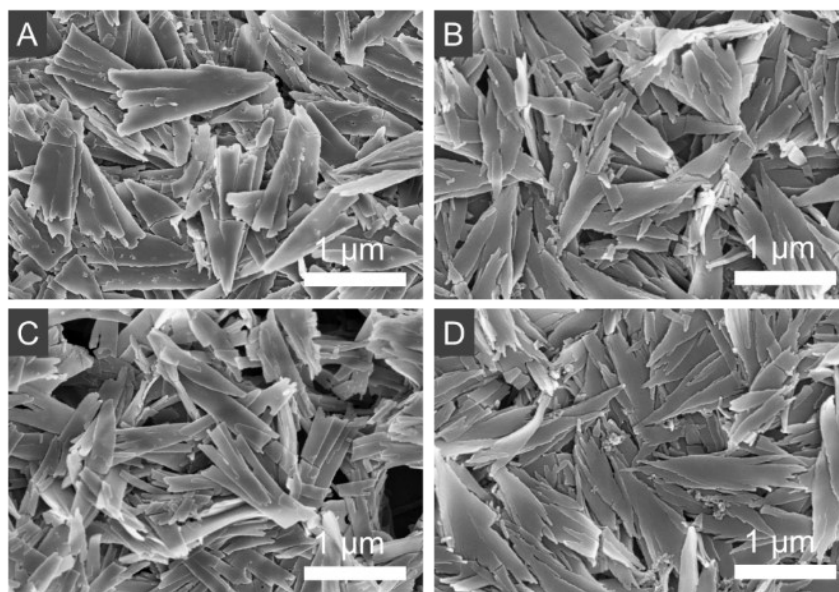

**Fig. S46.** SEM pictures of *R*-7 or *S*-7 in 70% CHCl<sub>3</sub>/n-hexane mixed solvent of the first (A for *R*-7, B for *S*-7) and second (C for *R*-7, D for *S*-7) parallel experiments.  $[7] = 1.0 \times 10^{-3}$  M, SEM measured from two independent sets of samples.

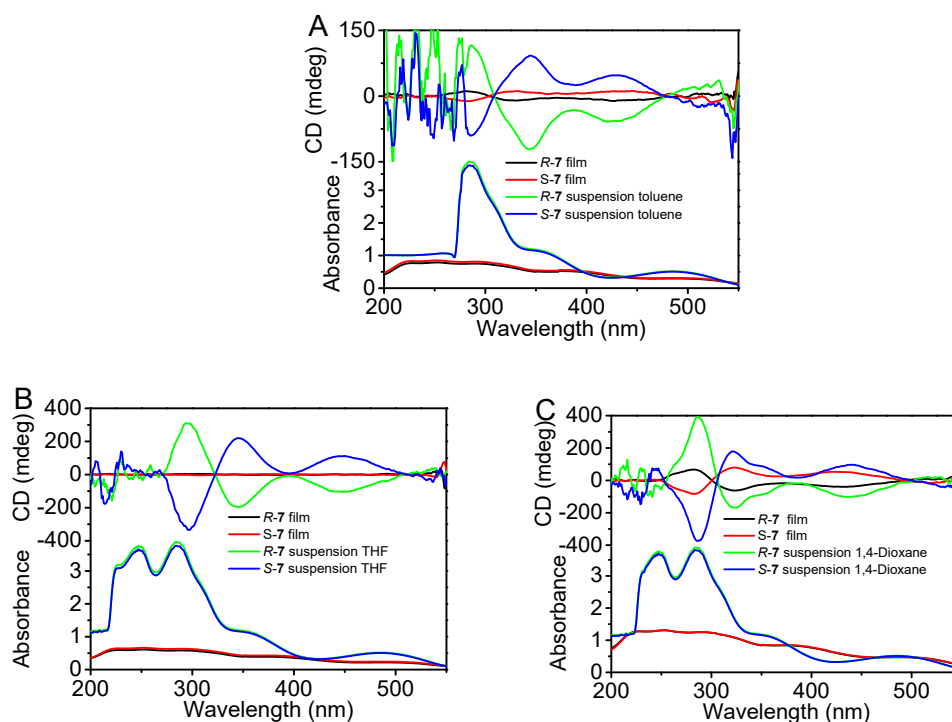

**Fig. S47.** CD and absorption spectra of suspension of *R*-7 and *S*-7 in different solvents and in a drop-coating film. (A) toluene, (B) THF, (C) 1,4-dioxane.  $[7] = 5.0 \times 10^{-4}$  M.

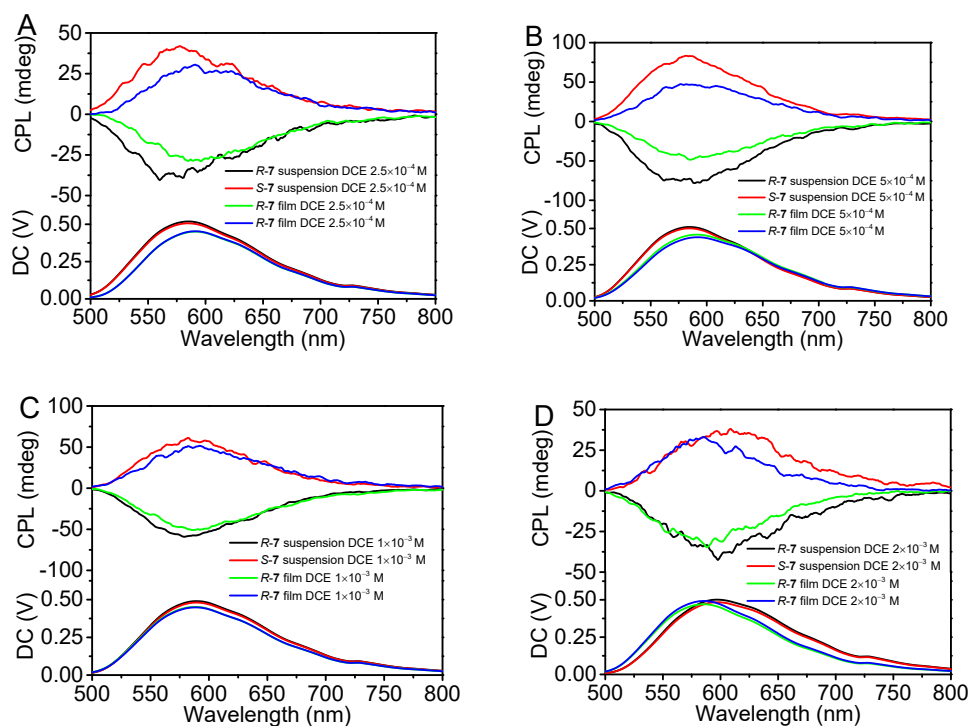

**Fig. S48.** CPL spectra of suspension of *R*-7 and *S*-7 in DCE at different concentration and in a drop-coating film. (A)  $[7] = 2.5 \times 10^{-4} \text{ M}$ , (B)  $[7] = 5.0 \times 10^{-4} \text{ M}$ , (C)  $[7] = 1.0 \times 10^{-3} \text{ M}$ , (D)  $[7] = 2.0 \times 10^{-3} \text{ M}$ .  $\lambda_{\text{ex}} = 350 \text{ nm}$ .

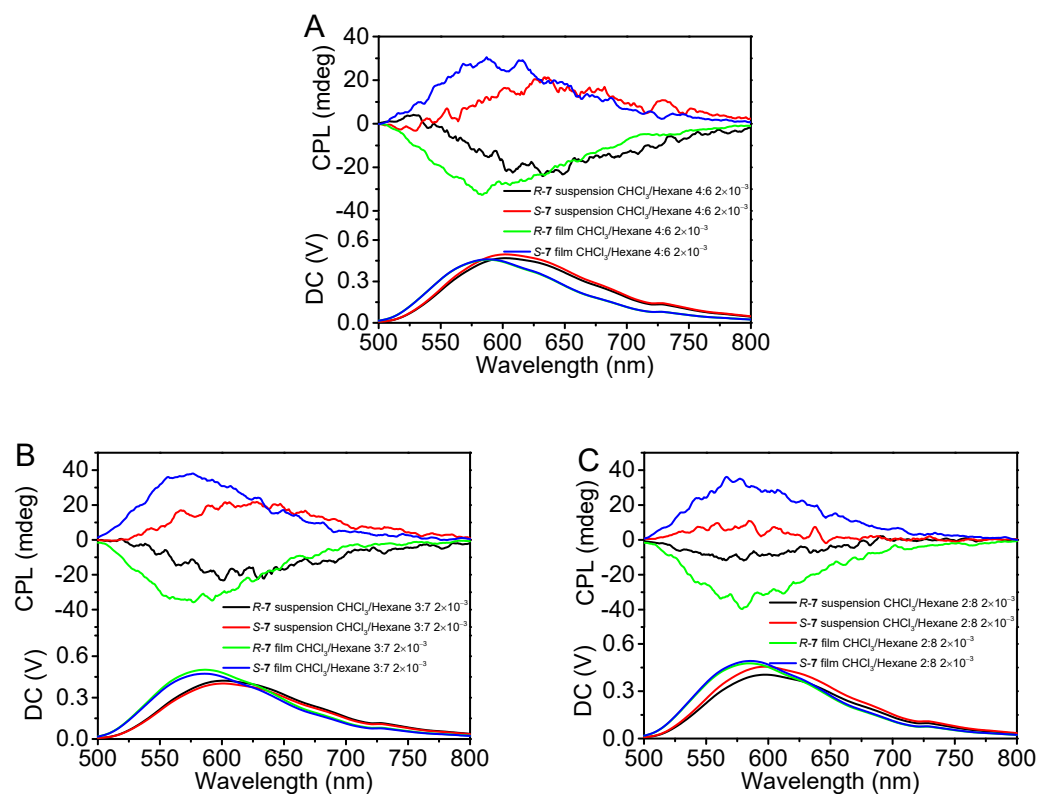

**Fig. S49.** CPL spectra of *R*-7 and *S*-7 in  $\text{CHCl}_3/\text{n-hexane}$  mixed solvent at different solvent ratios and in a drop-coating film. (A)  $\text{CHCl}_3/\text{n-hexane}$  4:6, (B)  $\text{CHCl}_3/\text{n-hexane}$  3:7, (C)  $\text{CHCl}_3/\text{n-hexane}$  2:8.  $\lambda_{\text{ex}} = 350 \text{ nm}$ ,  $[7] = 2.0 \times 10^{-3} \text{ M}$ .

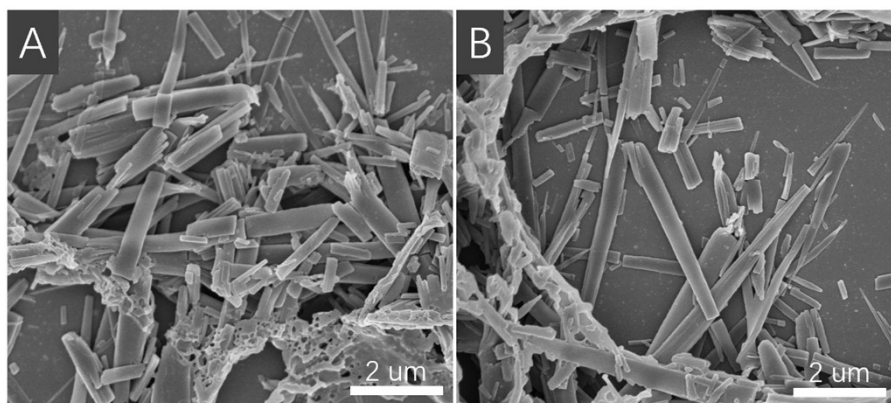

**Fig. S50.** SEM images of suspension of *R*-7 (A) and *S*-7 (B) in DCE.  $[7] = 5.0 \times 10^{-4}$  M.

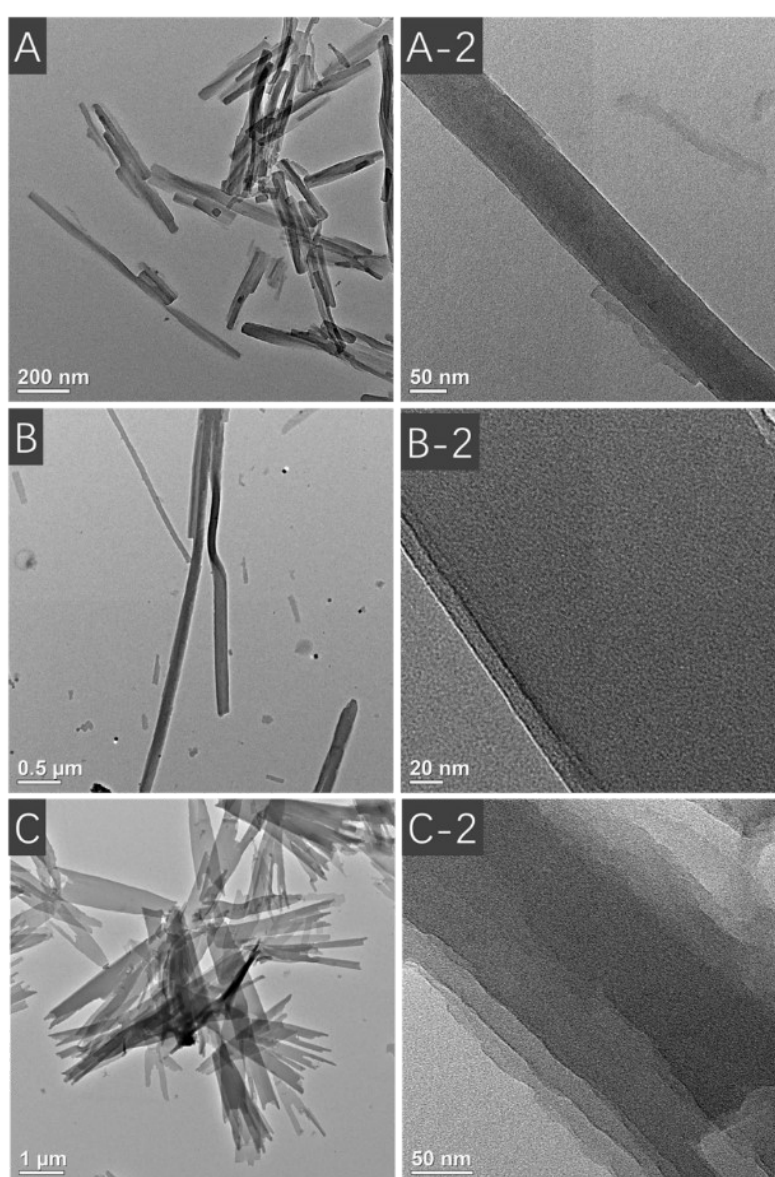

**Fig. S51.** HRTEM images of suspension of *R*-6 in benzene (A), *R*-7 in DCE (B), *R*-7 in CHCl<sub>3</sub>/n-hexane 3:7 (C).  $[6] = [7] = 5.0 \times 10^{-4}$  M.

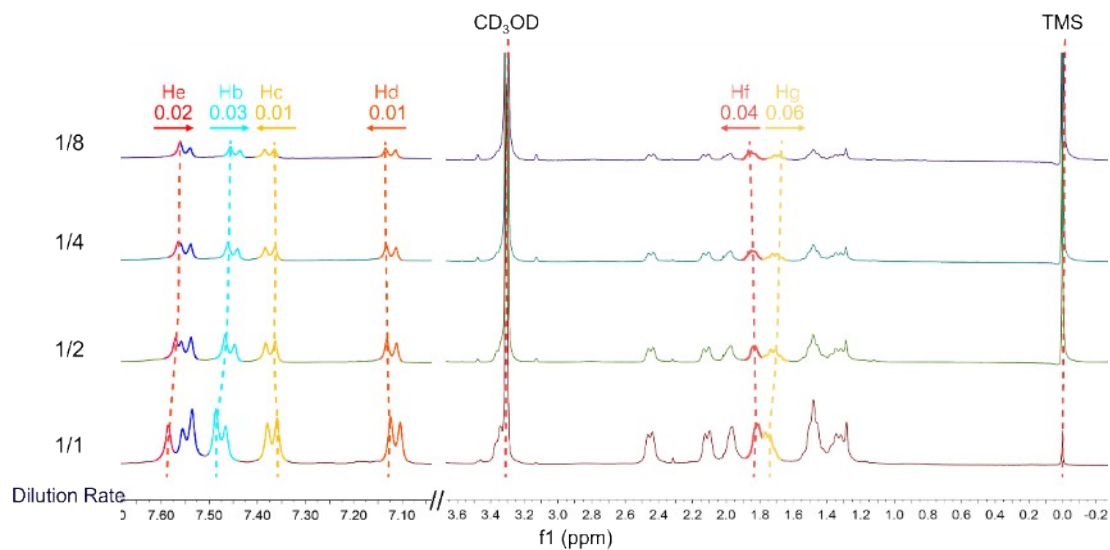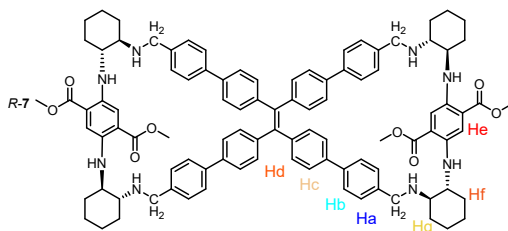

**Fig. S52.** Change in  $^1\text{H}$  NMR spectra of *R-7-4HCl* in  $\text{CD}_3\text{OD}$  with concentration.  $[\text{R-7-4HCl}] = 2.5 \times 10^{-3}$  M which was diluted to 1/2, 1/4, and 1/8. After the concentration was diluted by eight fold, the  $^1\text{H}$  NMR spectra of *R-7-4HCl* in  $\text{CD}_3\text{OD}$  showed the largest shift for methylene protons ( $-0.06$  ppm and  $+0.04$  ppm), and large shift for the phenyl protons of benzyl groups ( $-0.03$  ppm and  $+0.025$  ppm) and for the protons of DATP ( $-0.02$  ppm). This result demonstrated that the cyclohexyl ring of one molecule was included into the cavity of other molecule and a self-inclusion complex was formed in solution.

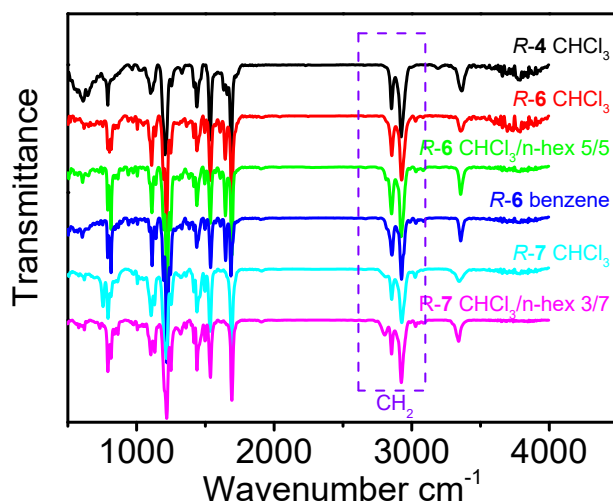

**Fig. S53.** FTIR spectra (E) of drop-cast films of *R-4*, *R-6* and *R-7* from different solvents.

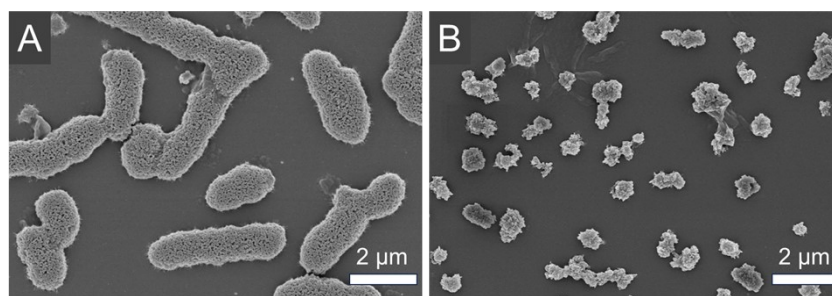

**Fig. S54.** SEM images of dropped-film of *R-6* (A) and *R-7* (B) from  $\text{CHCl}_3$  solution.  $[\mathbf{6}] = [\mathbf{7}] = 5.0 \times 10^{-4}$  M.

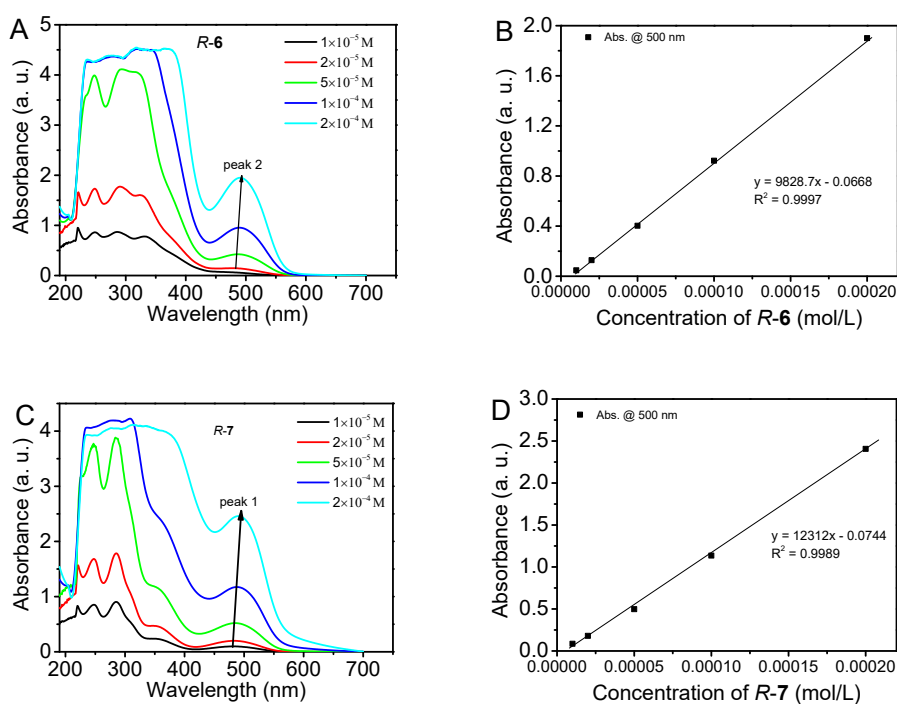

**Fig. S55.** Change in the UV-Vis spectra (A) and absorbance at 500 nm (B) of *R-6* in DCE with concentration, and change in the UV-Vis spectra (C) and absorbance at 500 nm (D) of *R-7* in DCE with concentration, the fitting curve is the relationship between absorption value and concentration of *R-6* or *R-7*.

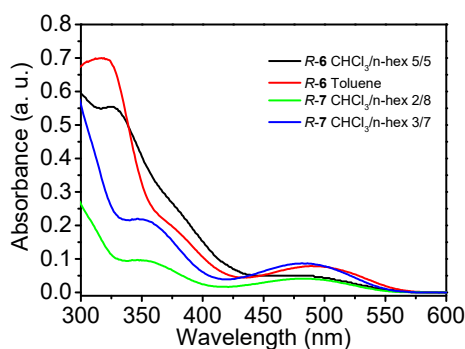

**Fig. S56.** The UV-Vis spectra were obtained from clearly saturated solutions of *R-6* and *R-7* in various solvents, which were attained through the filtration process of their respective self-assembled solutions.

### Binding constant of self-inclusion of R-6 or R-7

After poor solvent is added, both R-6 and R-7 would aggregate and precipitate out of the solution, and have following equation:

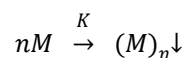

The binding constant, K, is therefore expressed as:

$$K = \frac{[(M)_n]}{[M]}$$

M represents the discrete macrocycle R-6 or R-7, [M] denotes the concentration of the discrete macrocycle in solution, and (M)<sub>n</sub> represents aggregates of the macrocycle after self-assembly and self-inclusion occurred. Since (M)<sub>n</sub> is a solid, its concentration [(M)<sub>n</sub>] is a fixed value of 1, so the binding constant here is essentially the reciprocal of the monomer concentration:

$$K = \frac{1}{[M]}$$

After obtaining the self-assembled solution, the precipitate is filtered out to yield a clear solution, which can be considered to contain discrete compounds R-6 and R-7. By further measuring the UV-Vis absorption spectra of different clear solutions, Fig. S56 is obtained. According to Beer's Law, at low concentrations, the absorption value of a compound exhibits a linear relationship with its concentration, as demonstrated in Fig. S55B and S55D. Consequently, based on the absorption value at 500 nm in Fig. S56, the corresponding concentration of compound R-6 or R-7 in the solution can be calculated. The reciprocal of these concentrations then corresponds to the binding constants, the calculation results are as follows:

**Table S1.** The calculation of binding constant of R-6 or R-7 in different solvents.

| Entry                               | Absorption value at 500 nm (A, a.u.) | Fitting curve           | Calculated concentration (C, mol/L) | Binding constant (M <sup>-1</sup> ) |
|-------------------------------------|--------------------------------------|-------------------------|-------------------------------------|-------------------------------------|
| R-6 in CHCl <sub>3</sub> /n-hex 5/5 | 0.043                                | A = 9828.7C – 0.0668    | 1.1×10 <sup>-5</sup>                | 9.0×10 <sup>4</sup>                 |
| R-6 in toluene                      | 0.076                                | R <sup>2</sup> = 0.9997 | 1.5×10 <sup>-5</sup>                | 6.9×10 <sup>4</sup>                 |
| R-7 in CHCl <sub>3</sub> /n-hex 2/8 | 0.037                                | A = 12312C – 0.0744     | 9.1×10 <sup>-6</sup>                | 1.1×10 <sup>5</sup>                 |
| R-7 in CHCl <sub>3</sub> /n-hex 3/7 | 0.078                                | R <sup>2</sup> = 0.9989 | 1.2×10 <sup>-5</sup>                | 8.1×10 <sup>4</sup>                 |

### Chiral recognition and chiral analysis



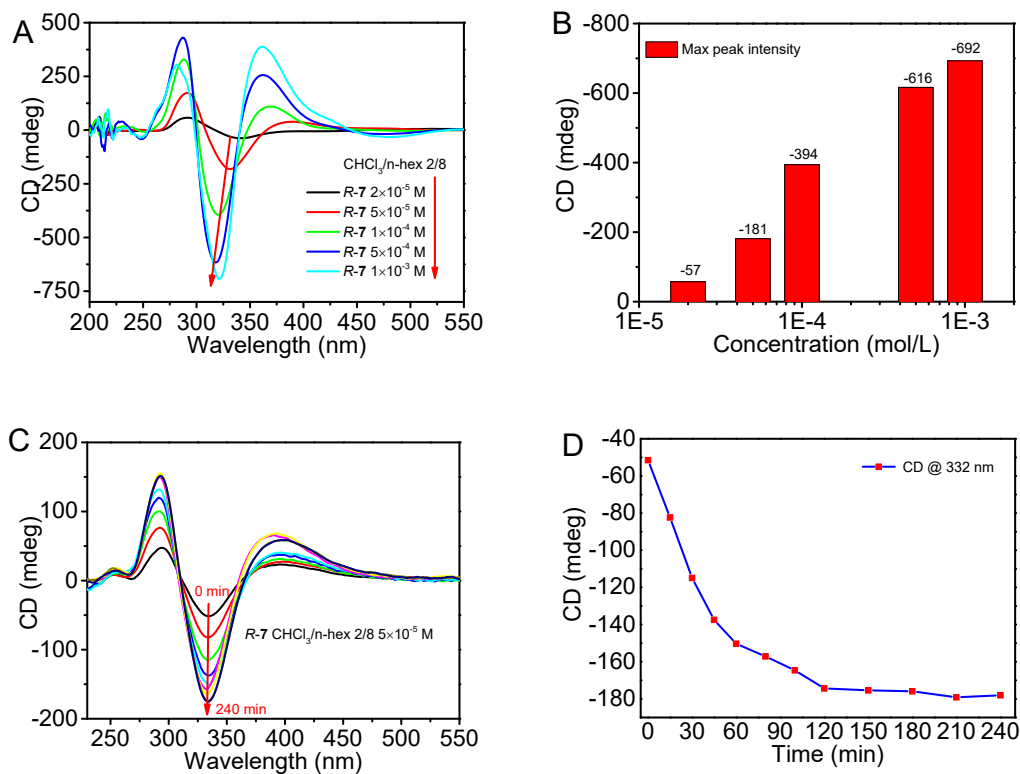

**Fig. S57.** Change in CD spectra of suspension of *R-7* in CHCl<sub>3</sub>/n-hexane 2:8 with different concentration (A and B). Change in CD spectra of suspension of *R-7* with time that was left to stand after addition of 80% n-hexane into CHCl<sub>3</sub> (C) and change of CD intensity at 332 nm with time (D), [7] =  $5.0 \times 10^{-5}$  M.

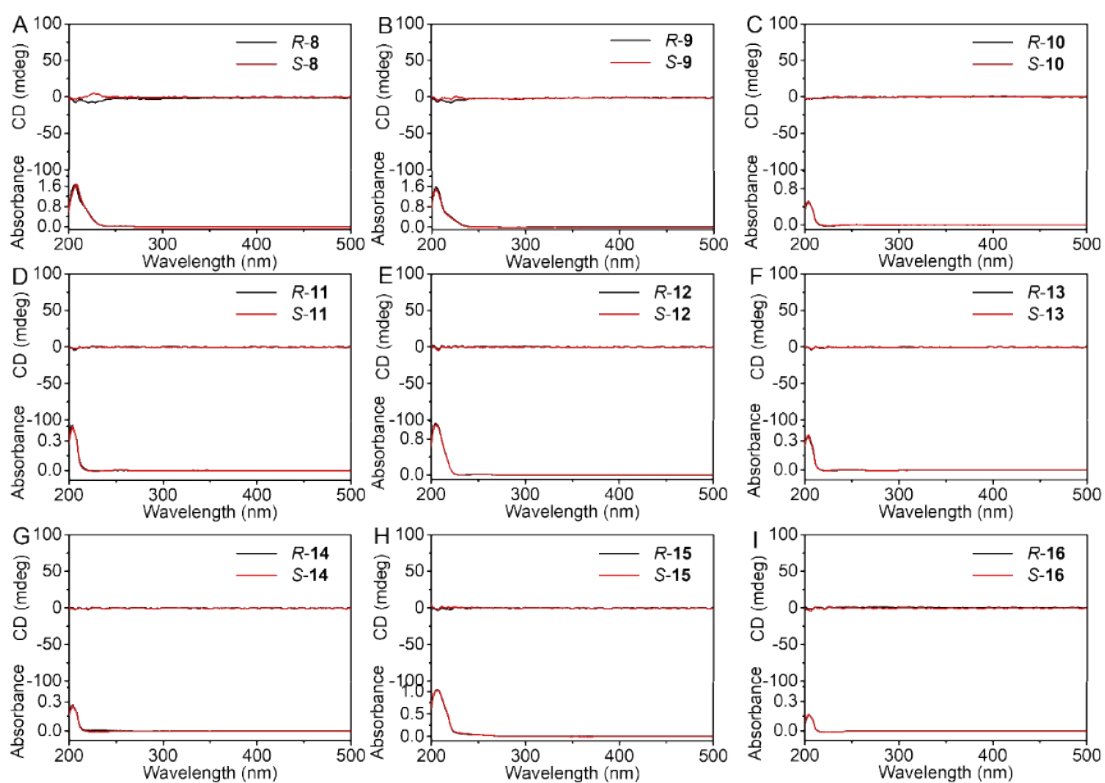

**Fig. S58.** CD spectra of two enantiomers of chiral molecules in  $\text{CHCl}_3/\text{n-hexane}$  2:8. (A) 2-Chloromandelic acid **8**. (B) Mandelic acid **9**. (C) Camphorsulfonic acid **10**. (D) Malic acid **11**. (E)  $\alpha$ -Methylbenzylamine **12**. (F) Cyclohexylethylamine **13**. (G) Cyclohexane-1,2-diamine **14**. (H) Phenylalanine **15**. (I) Menthol **16**.  $[\mathbf{8}] = [\mathbf{9}] = 2[\mathbf{10}] = 2[\mathbf{11}] = [\mathbf{12}] = [\mathbf{13}] = [\mathbf{14}] = [\mathbf{15}] = [\mathbf{16}] = 1.0 \times 10^{-4}$  M, the solvent for (H) contained 1% methanol, the solvent for (A)-(G) and (I) contained 1% ethanol.

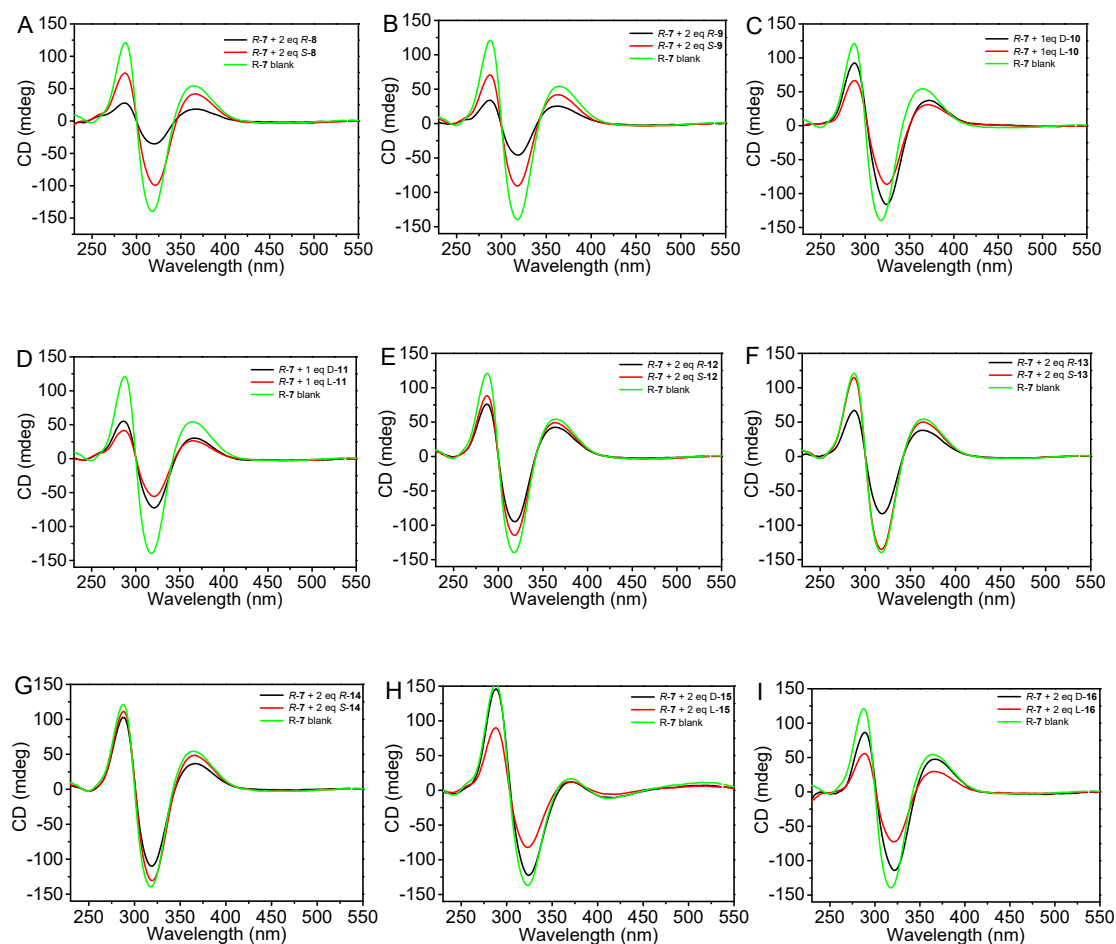

**Fig. S59.** Change in CD spectra of *R*-7 with two enantiomers of a variety of chiral molecules in  $\text{CHCl}_3$ /*n*-hexane 2:8. (A) 2-Chloromandelic acid **8**/*R*-7 2:1. (B) Mandelic acid **9**/*R*-7 2:1. (C) Camphorsulfonic acid **10**/*R*-7 1:1. (D) Malic acid **11**/*R*-7 1:1. (E)  $\alpha$ -Methylbenzylamine **12**/*R*-7 2:1. (F) Cyclohexylethylamine **13**/*R*-7 2:1. (G) Cyclohexane-1,2-diamine **14**/*R*-7 2:1. (H) Phenylalanine **15**/*R*-7 2:1. (I) Menthol **16**/*R*-7 2:1.  $[R-7] = 5.0 \times 10^{-5}$  M, the solvent for (H) contained 1% methanol, the solvent for (A)-(G) and (I) contained 1% ethanol.

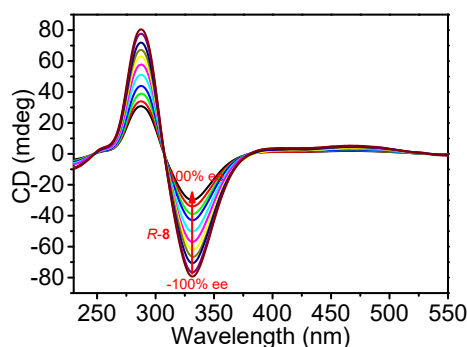

**Fig. S60.** Change in CD spectra of the suspension of *R*-7 in  $\text{CHCl}_3$ /*n*-hexane/methanol 20:80:1 with ee% of *R*-8.  $[R-7] = 1/2[8] = 4.0 \times 10^{-5}$  M.

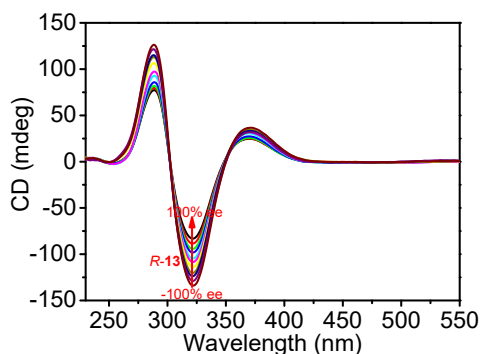

**Fig. S61.** Change in CD spectra of the suspension of *R*-7 with ee% of *R*-13 in CHCl<sub>3</sub>/n-hexane/ethanol 20:80:1. [*R*-7] = 1/2[**13**] = 5.0 × 10<sup>-5</sup> M.

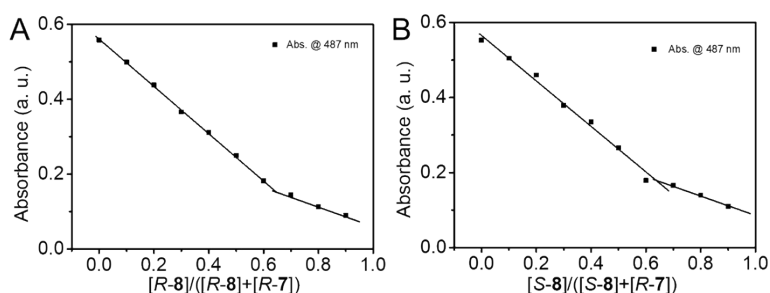

**Fig. S62.** Mole ratio plot for *R*-7 and **8**, indicating 1:2 stoichiometry (A) *R*-8, (B) *S*-8. [*R*-7] + [**8**] = 5.0 × 10<sup>-5</sup> M, CHCl<sub>3</sub>/n-hexane 2:8.

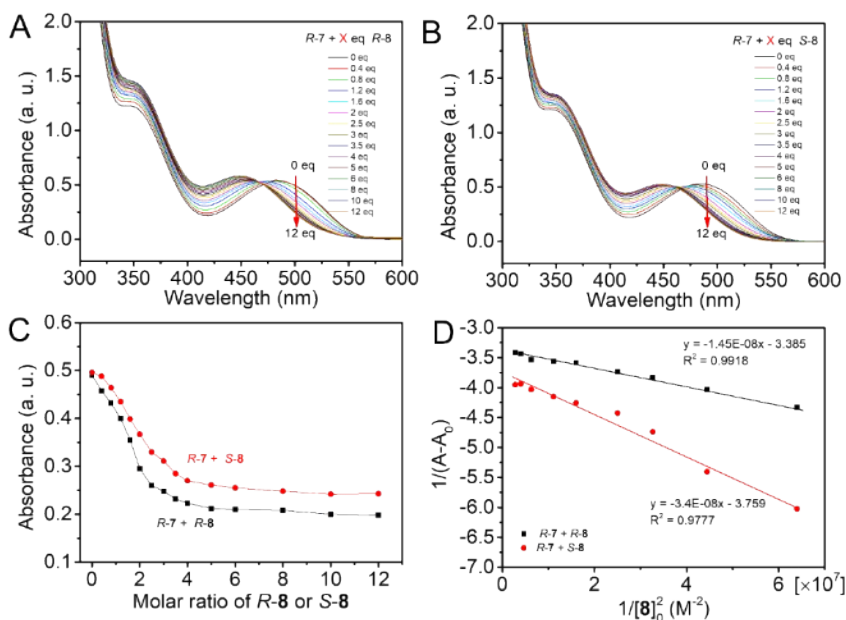

**Fig. S63.** Change of UV spectra of *R*-7 with different molar ratio of (A) *R*-8, (B) *S*-8 in solution, and (C) change of absorption values at 500 nm. The non-linear curve-fitting (UV titrations) for the host-guest complexation of *R*-7 with different concentration of **8** (D), the binding constant was calculated by Benesi-Hildebrand equation for 1:2 association to be about 2.3 × 10<sup>8</sup> M<sup>-1</sup> for *R*-7+*R*-8, and 1.1 × 10<sup>8</sup> M<sup>-1</sup> for *R*-7+*S*-8. [*R*-7] = 5.0 × 10<sup>-5</sup> M, CHCl<sub>3</sub>/n-hexane 2:8.

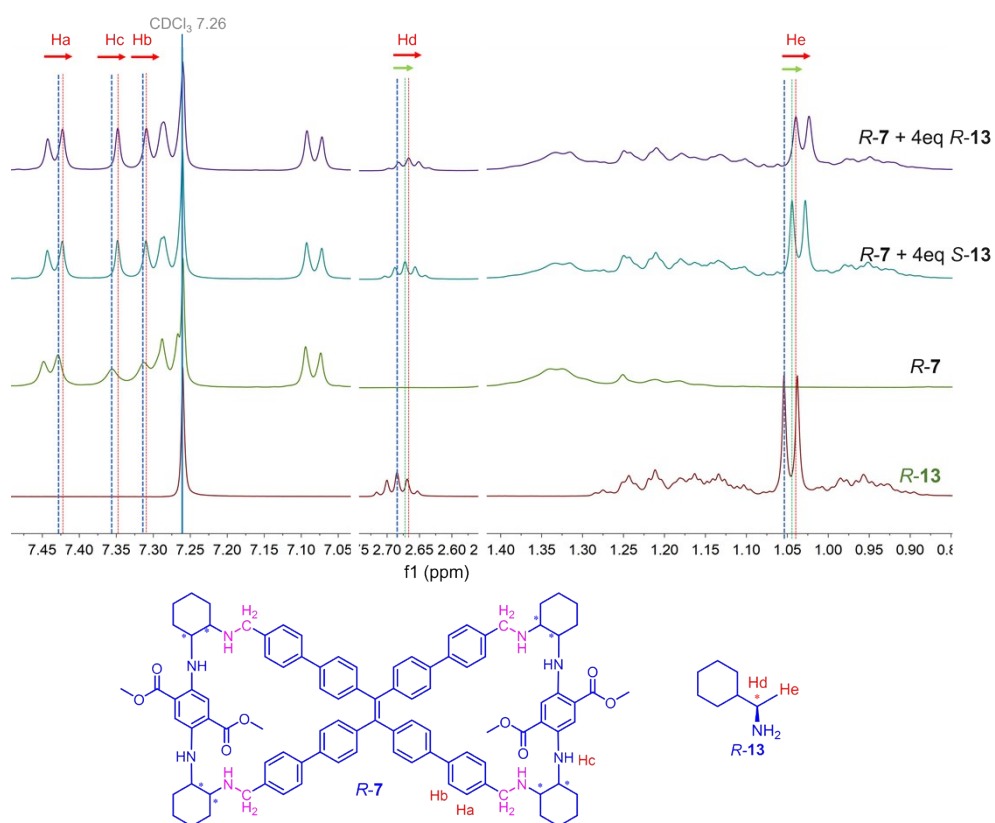

**Fig. S64.** <sup>1</sup>H NMR spectra of *R-7*, *R-13*, *R-7* + 4 eq *R-13* and *R-7* + 4 eq *S-13*. [*R-7*] = 1/4[*13*] = 2.0 × 10<sup>-3</sup> M.

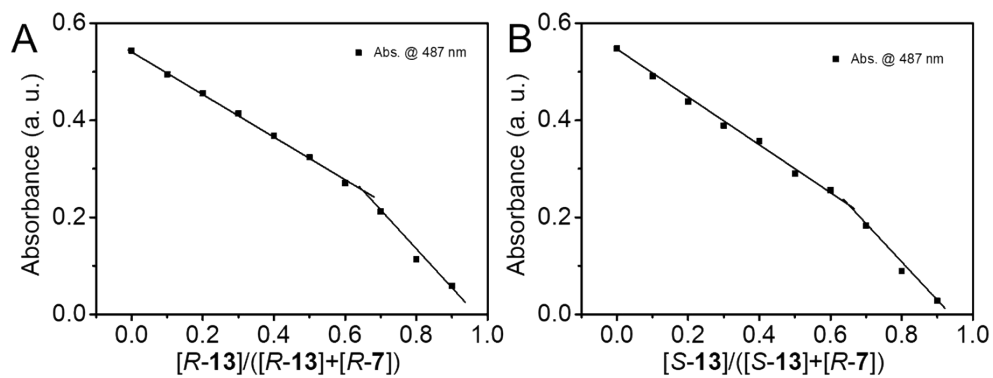

**Fig. S65.** Mole ratio plot for *R-7* and *13*, indicating 1:2 stoichiometry (A) *R-8*, (B) *S-8*. [*R-7*] + [*13*] = 5.0 × 10<sup>-5</sup> M, CHCl<sub>3</sub>/n-hexane 2:8.

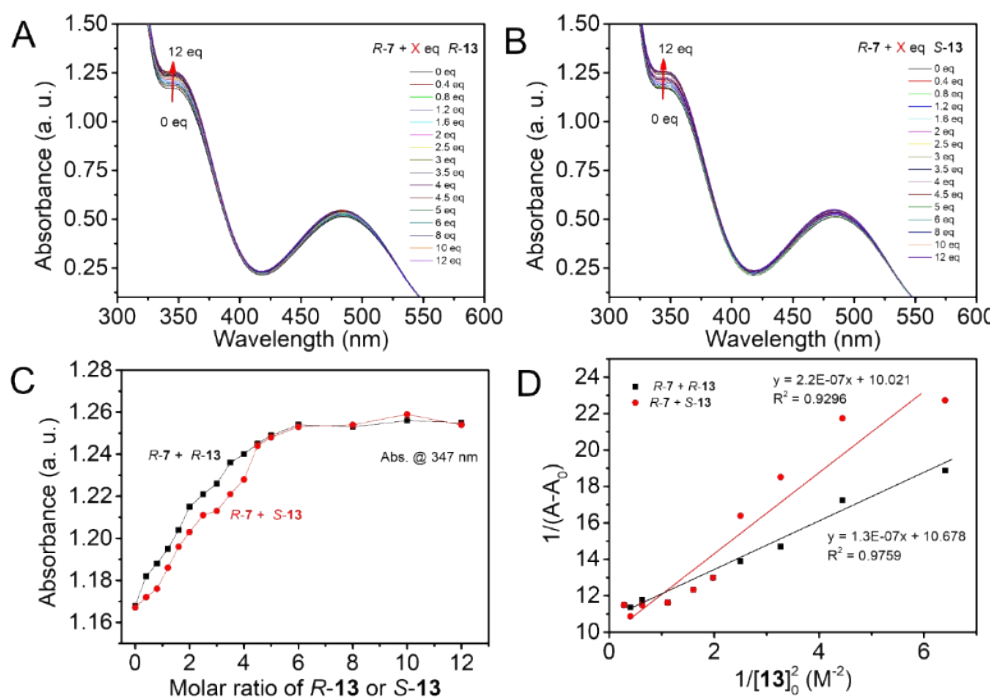

**Fig. S66.** Change of UV spectra of *R-7* with different molar ratio of (A) *R-13*, (B) *S-13* in solution, and (C) change of absorption values at 500 nm. The non-linear curve-fitting (UV titrations) for the host-guest complexation of *R-7* with different concentration of **13** (D), the binding constant was calculated to be about  $8.2 \times 10^7 \text{ M}^{-1}$  for *R-7*+*R-13*, and  $4.6 \times 10^7 \text{ M}^{-1}$  for *R-7*+*S-13*.  $[R-7] = 5.0 \times 10^{-5} \text{ M}$ ,  $\text{CHCl}_3/\text{n-hexane}$  2:8.

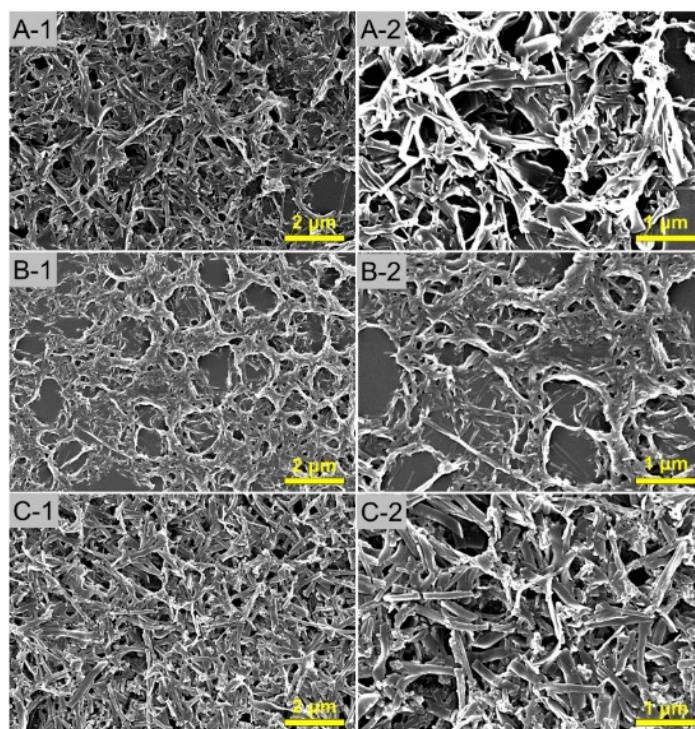

**Fig. S67.** SEM pictures of *R-7* (A, A-1), *R-7* + 2 eq *R-13* (B, B-1) and *R-7* + 2 eq *S-13* (C, C-1).  $[R-7] = 1/2[13] = 5.0 \times 10^{-4} \text{ M}$ ,  $\text{CHCl}_3/\text{n-hexane}$  2:8. *R-7* + 2 eq *R-13* has more fragmented assemblies, compared to *R-7* + 2 eq *S-13*.
